# Supplementary material for: Acidic tributyl phosphonium-based ionic liquid: an efficient catalyst for preparation of diverse pyridine systems via a cooperative vinylogous anomeric-based oxidation
Source: Royal Society of Chemistry journal article supplement (doi:10.1039/d2ra04631h), 2022-01-01

## Acidic tributyl phosphonium-based ionic liquid: An efficient catalyst for preparation of diverse pyridine systems via a cooperative vinylogous anomeric-based oxidation

Sepideh Jalalimola<sup>a</sup>, Morteza Torabi<sup>a</sup>, Meysam Yarie<sup>a</sup>, Mohammad Ali Zolfigol<sup>a\*</sup>

<sup>a</sup>Department of Organic Chemistry, Faculty of Chemistry, Bu-Ali Sina University, Hamedan, Iran

Correspondence: M.A. Zolfigol, Email: mzolfigol@yahoo.com

- 1: FT-IR spectrum of tributyl(3-sulfopropyl) phosphonium trifluoroacetate.
- 2: <sup>1</sup>H NMR spectrum of tributyl(3-sulfopropyl) phosphonium trifluoroacetate.
- 3: <sup>13</sup>C NMR spectrum of tributyl(3-sulfopropyl) phosphonium trifluoroacetate.
- 4: FT-IR spectrum of 2-amino-4-(2-methoxyphenyl)-6-phenylnicotinonitrile (1b).
- 5: <sup>1</sup>H NMR spectrum of 2-amino-4-(2-methoxyphenyl)-6-phenylnicotinonitrile (1b).
- 6: <sup>13</sup>C NMR spectrum of 2-amino-4-(2-methoxyphenyl)-6-phenylnicotinonitrile (1b).
- 7: FT-IR spectrum of 2'-amino-6'-phenyl-[3,4'-bipyridine]-3'-carbonitrile (1c).
- 8: <sup>1</sup>H NMR spectrum of 2'-amino-6'-phenyl-[3,4'-bipyridine]-3'-carbonitrile (1c).
- 9: <sup>13</sup>C NMR spectrum of 2'-amino-6'-phenyl-[3,4'-bipyridine]-3'-carbonitrile (1c).
- 10: FT-IR spectrum of 2-amino-4-(4-chlorophenyl)-6-phenylnicotinonitrile (1d).
- 11: <sup>1</sup>H NMR spectrum of 2-amino-4-(4-chlorophenyl)-6-phenylnicotinonitrile (1d).
- 12: <sup>13</sup>C NMR spectrum of 2-amino-4-(4-chlorophenyl)-6-phenylnicotinonitrile (1d).
- 13: FT-IR spectrum of 2-amino-4-(2-chlorophenyl)-6-phenylnicotinonitrile (1e).
- 14: <sup>1</sup>H NMR spectrum of 2-amino-4-(2-chlorophenyl)-6-phenylnicotinonitrile (1e).
- 15: <sup>13</sup>C NMR spectrum of 2-amino-4-(2-chlorophenyl)-6-phenylnicotinonitrile (1e).
- 16: FT-IR spectrum of 2-amino-5-methyl-4,6-diphenylnicotinonitrile (1f).
- 17: <sup>1</sup>H NMR spectrum of 2-amino-5-methyl-4,6-diphenylnicotinonitrile (1f).
- 18: <sup>13</sup>C NMR spectrum of 2-amino-5-methyl-4,6-diphenylnicotinonitrile (1f).
- 19: FT-IR spectrum of 2'-amino-5'-methyl-6'-phenyl-[3,4'-bipyridine]-3'-carbonitrile (1h).
- 20: <sup>1</sup>H NMR spectrum of 2'-amino-5'-methyl-6'-phenyl-[3,4'-bipyridine]-3'-carbonitrile (1h).
- 21: <sup>13</sup>C NMR spectrum of 2'-amino-5'-methyl-6'-phenyl-[3,4'-bipyridine]-3'-carbonitrile (1h).
- 22: FT-IR spectrum of 2-amino-4-(4-isopropylphenyl)-5-methyl-6-phenylnicotinonitrile (1g).
- 23: <sup>1</sup>H NMR spectrum of 2-amino-4-(4-isopropylphenyl)-5-methyl-6-phenylnicotinonitrile (1g).

- 24: Mass spectrum of 2-amino-4-(4-isopropylphenyl)-5-methyl-6-phenylnicotinonitrile (1g).
- 25: FT-IR spectrum of 2-amino-4-(4-hydroxyphenyl)-6-(naphthalen-2-yl)nicotinonitrile (1i).
- 26: <sup>1</sup>H NMR spectrum of 2-amino-4-(4-hydroxyphenyl)-6-(naphthalen-2-yl)nicotinonitrile (1i).
- 27: <sup>13</sup>C NMR spectrum of 2-amino-4-(4-hydroxyphenyl)-6-(naphthalen-2-yl)nicotinonitrile (1i).
- 28: Mass spectrum of 2-amino-4-(4-hydroxyphenyl)-6-(naphthalen-2-yl)nicotinonitrile (1i).
- 29: FT-IR spectrum of 2-amino-4-(4-chlorophenyl)-6-(naphthalen-2-yl)nicotinonitrile (1j).
- 30: FT-IR spectrum of 2-amino-4-(2-chlorophenyl)-6-(naphthalen-2-yl)nicotinonitrile (1k).
- 31: <sup>1</sup>H NMR spectrum of 2-amino-4-(2-chlorophenyl)-6-(naphthalen-2-yl)nicotinonitrile (1k).
- 32: <sup>13</sup>C NMR spectrum of 2-amino-4-(2-chlorophenyl)-6-(naphthalen-2-yl)nicotinonitrile (1k).
- 33: Mass spectrum of 2-amino-4-(2-chlorophenyl)-6-(naphthalen-2-yl)nicotinonitrile (1k).
- 34: FT-IR spectrum of 2-amino-4-(4-nitrophenyl)-6-(naphthalen-2-yl)nicotinonitrile (1l).
- 35: FT-IR spectrum of 2'-(1*H*-indol-3-yl)-6'-(naphthalen-2-yl)-[3,4'-bipyridine]-3'-carbonitrile (1m).
- 36: <sup>1</sup>H NMR spectrum of 2'-(1*H*-indol-3-yl)-6'-(naphthalen-2-yl)-[3,4'-bipyridine]-3'-carbonitrile (1m).
- 37: <sup>13</sup>C NMR spectrum of 2'-(1*H*-indol-3-yl)-6'-(naphthalen-2-yl)-[3,4'-bipyridine]-3'-carbonitrile (1m).
- 38: Mass spectrum of 2'-(1*H*-indol-3-yl)-6'-(naphthalen-2-yl)-[3,4'-bipyridine]-3'-carbonitrile (1m).
- 39: FT-IR spectrum of 2,4,6-triphenylpyridine (2a).
- 40: <sup>1</sup>H NMR spectrum of 2,4,6-triphenylpyridine (2a).
- 41: <sup>13</sup>C NMR spectrum of 2,4,6-triphenylpyridine (2a).
- 42: FT-IR spectrum of 2,6-diphenyl-4,4'-bipyridine (2b).
- 43: FT-IR spectrum of 2,6-diphenyl-4,3'-bipyridine (2c).
- 44: Mass spectrum of 2,6-diphenyl-4,3'-bipyridine (2c).
- 45: FT-IR spectrum of 4-(4-chlorophenyl)-2,6-diphenylpyridine (2d).
- 46: <sup>1</sup>H NMR spectrum of 4-(4-chlorophenyl)-2,6-diphenylpyridine (2d).
- 47: <sup>13</sup>C NMR spectrum of 4-(4-chlorophenyl)-2,6-diphenylpyridine (2d).
- 48: FT-IR spectrum of 3,5-dimethyl-2,4,6-triphenylpyridine (2e).
- 49: Mass spectrum of 3,5-dimethyl-2,4,6-triphenylpyridine (2e).
- 50: FT-IR spectrum of 2,6-di(naphthalen-2-yl)-4-(*p*-tolyl)pyridine (2f).
- 51: <sup>1</sup>H NMR spectrum of 2,6-di(naphthalen-2-yl)-4-(*p*-tolyl)pyridine (2f).
- 52: <sup>13</sup>C NMR spectrum of 2,6-di(naphthalen-2-yl)-4-(*p*-tolyl)pyridine (2f).
- 53: FT-IR spectrum of 4-(3-fluorophenyl)-2,6-di(naphthalen-2-yl)pyridine (2g).

54:  $^1\text{H}$  NMR spectrum of 4-(3-fluorophenyl)-2,6-di(naphthalen-2-yl)pyridine (2g).

55:  $^{13}\text{C}$  NMR spectrum of 4-(3-fluorophenyl)-2,6-di(naphthalen-2-yl)pyridine (2g).

56: FT-IR spectrum of 4-(4-bromophenyl)-2,6-di(naphthalen-2-yl)pyridine (2h).

57: FT-IR spectrum of 4-(furan-2-yl)-2,6-di(naphthalen-2-yl)pyridine (2i).

1: FT-IR spectrum of tributyl(3-sulfopropyl) phosphonium trifluoroacetate.

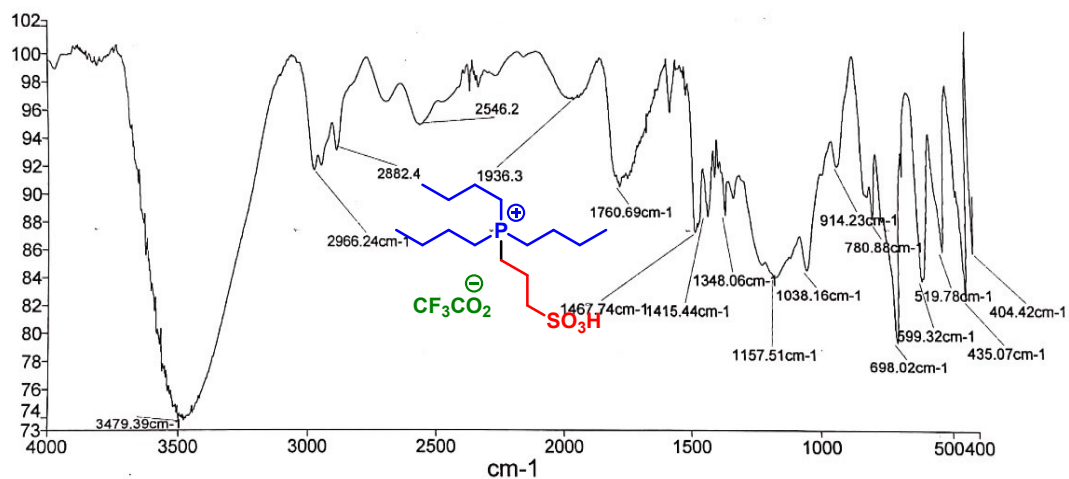

2: <sup>1</sup>H NMR spectrum of tributyl(3-sulfopropyl) phosphonium trifluoroacetate.

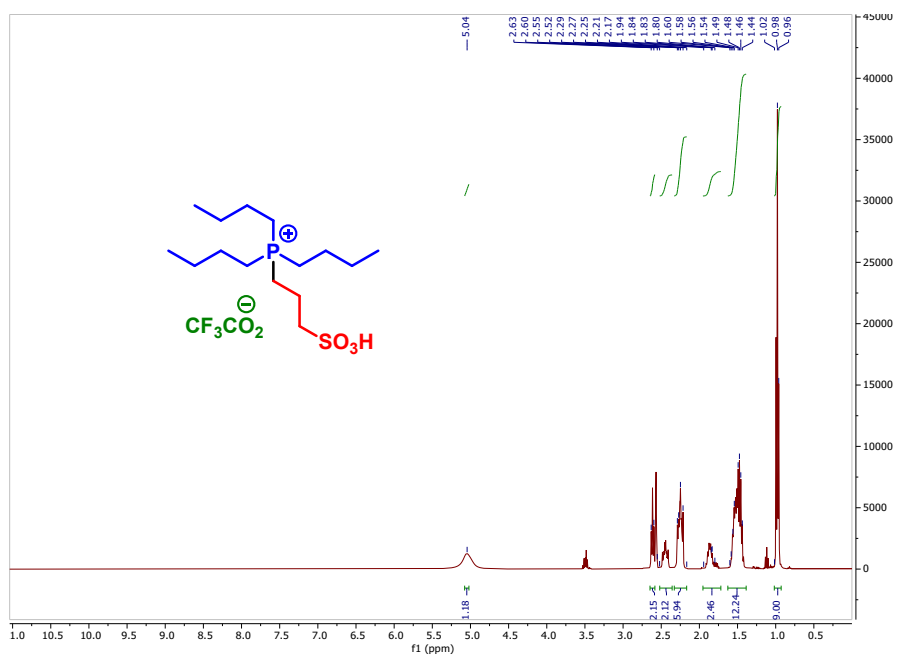

3:  $^{13}\text{C}$  NMR spectrum of tributyl(3-sulfopropyl) phosphonium trifluoroacetate.

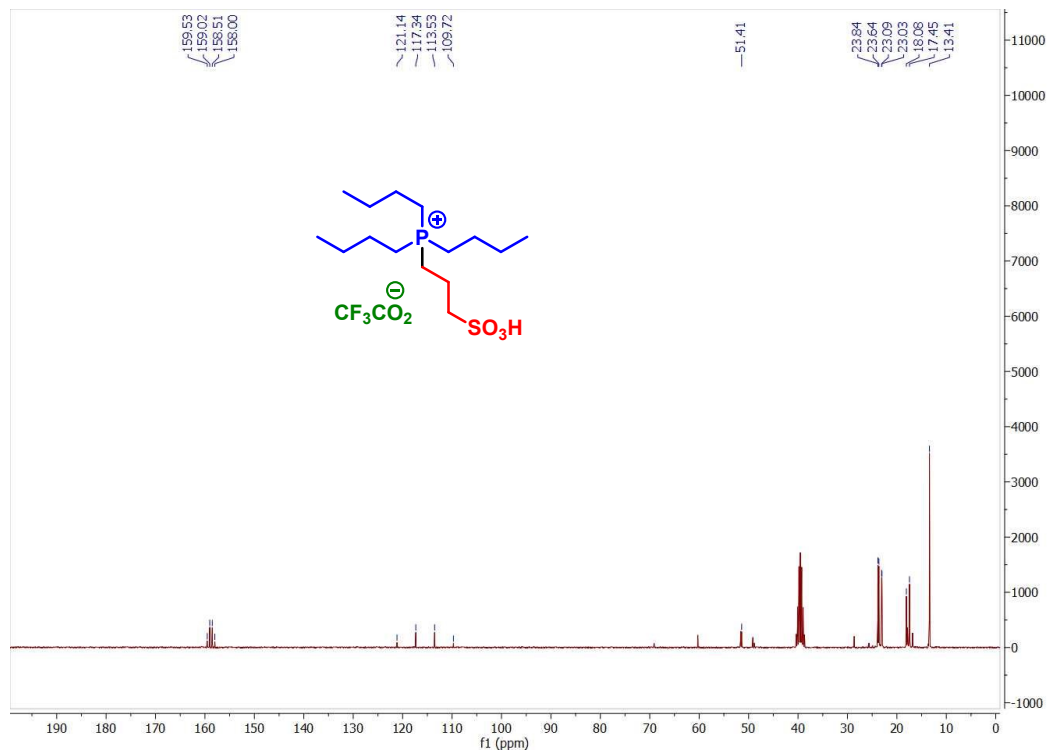

4: FT-IR spectrum of 2-amino-4-(2-methoxyphenyl)-6-phenylnicotinonitrile (1b).

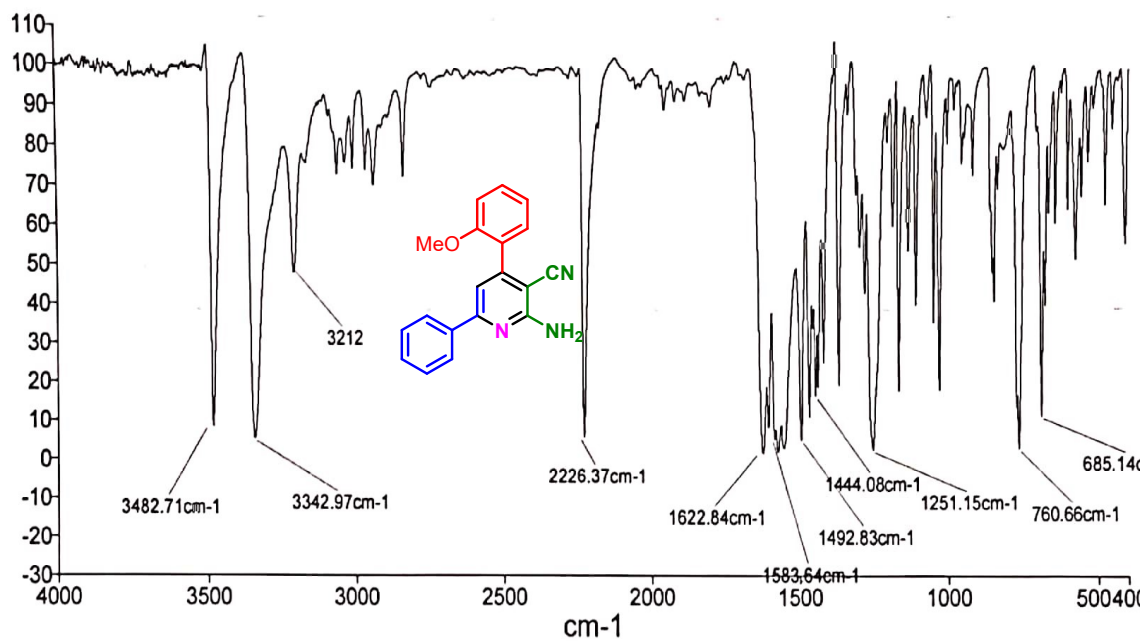

5:  $^1\text{H}$  NMR spectrum of 2-amino-4-(2-methoxyphenyl)-6-phenylnicotinonitrile (1b).

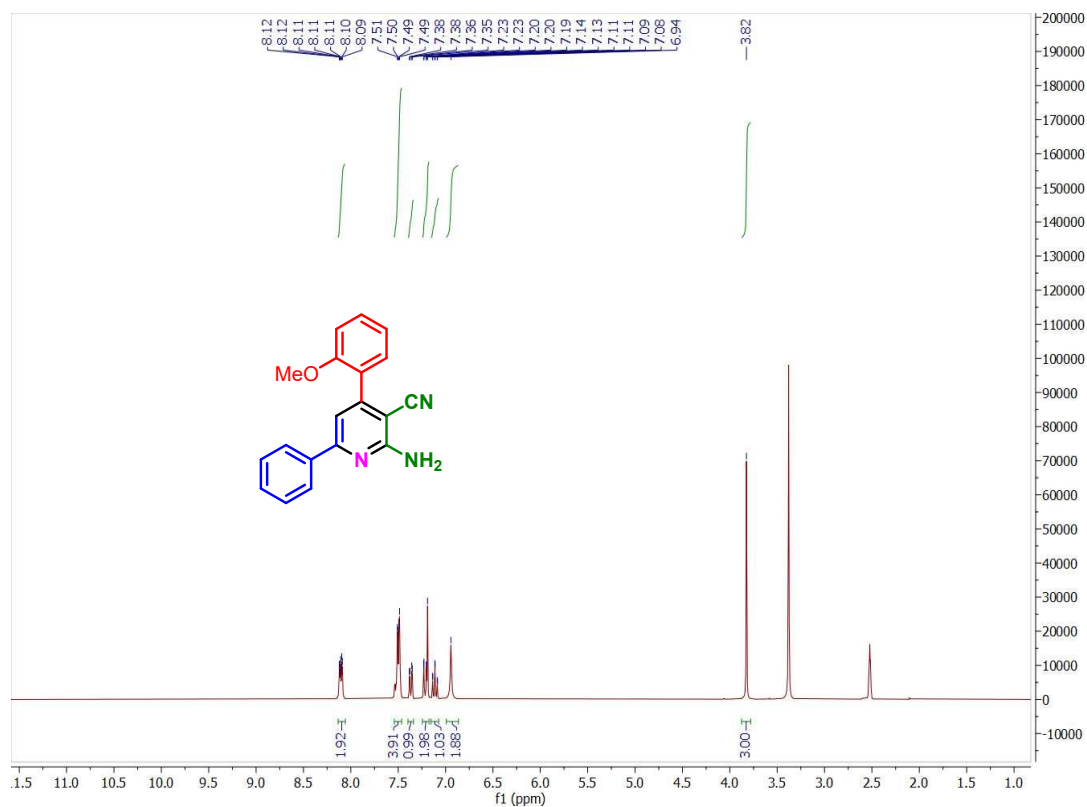

6:  $^{13}\text{C}$  NMR spectrum of 2-amino-4-(2-methoxyphenyl)-6-phenylnicotinonitrile (1b).

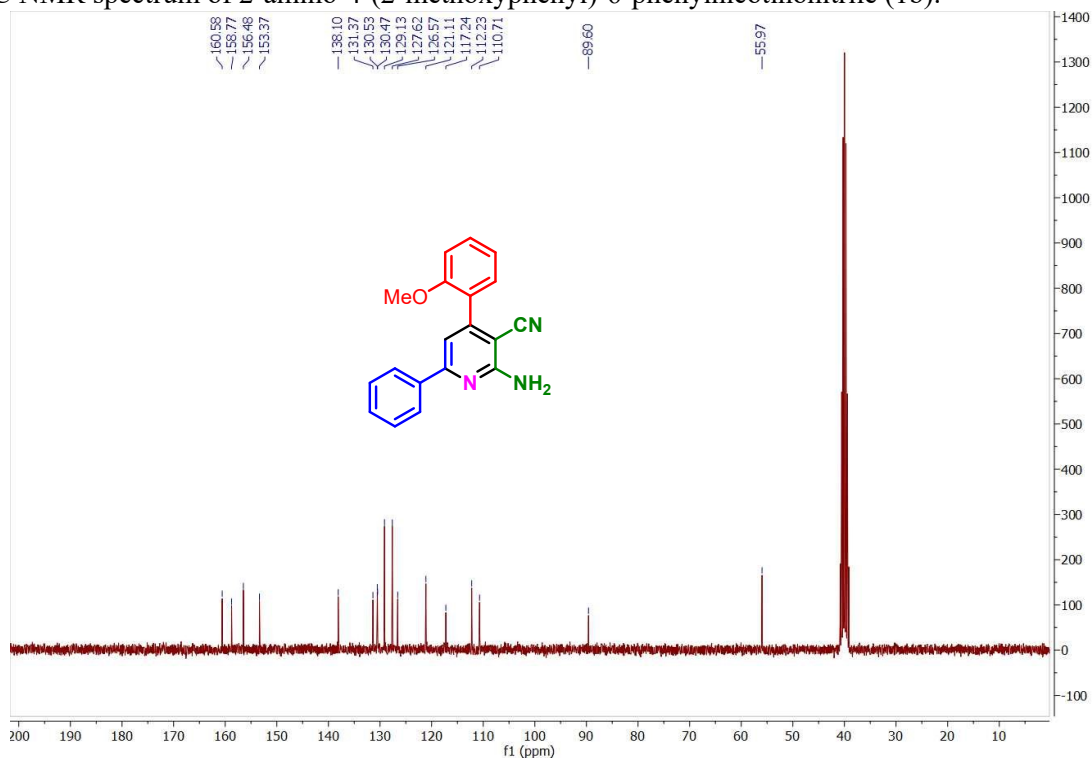

7: FT-IR spectrum of 2'-amino-6'-phenyl-[3,4'-bipyridine]-3'-carbonitrile (1c).

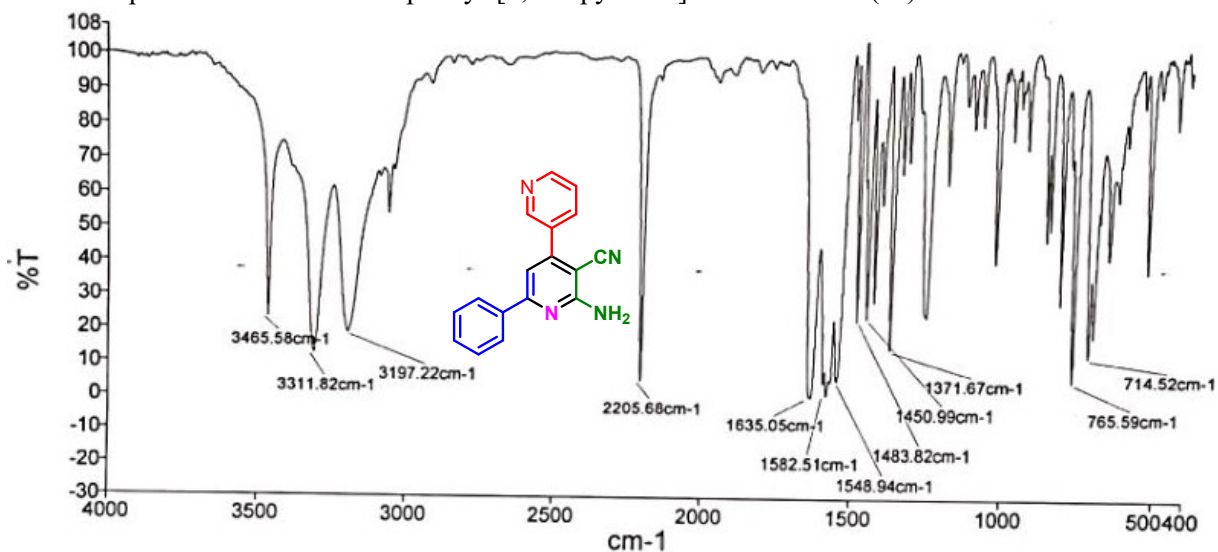

8: <sup>1</sup>H NMR spectrum of 2'-amino-6'-phenyl-[3,4'-bipyridine]-3'-carbonitrile (1c).

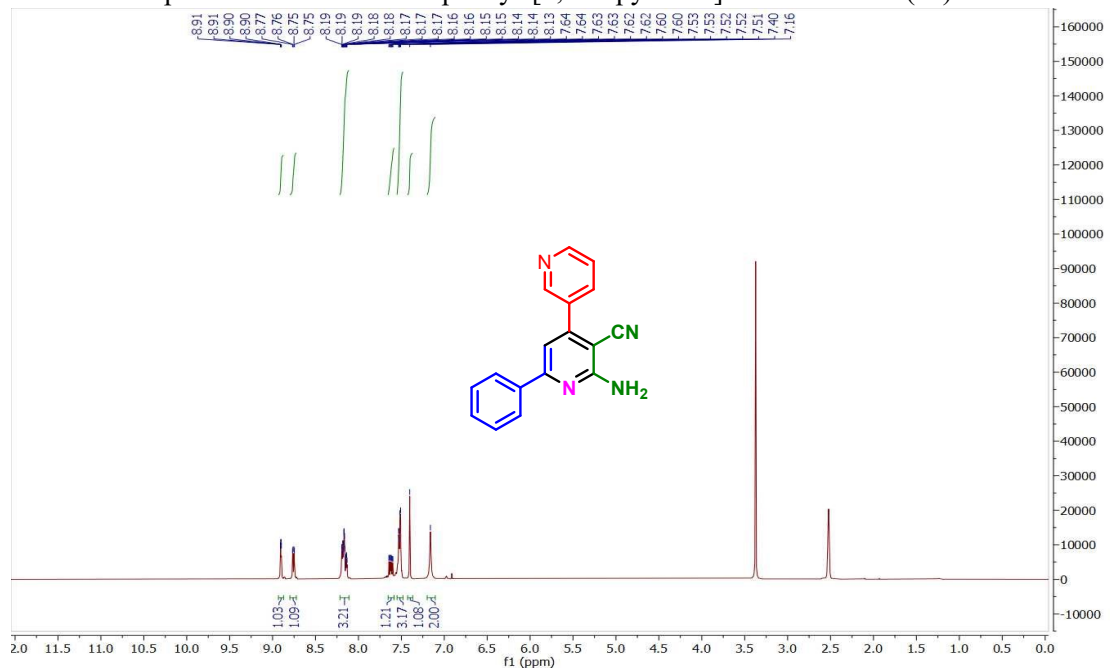

9: <sup>13</sup>C NMR spectrum of 2'-amino-6'-phenyl-[3,4'-bipyridine]-3'-carbonitrile (1c).

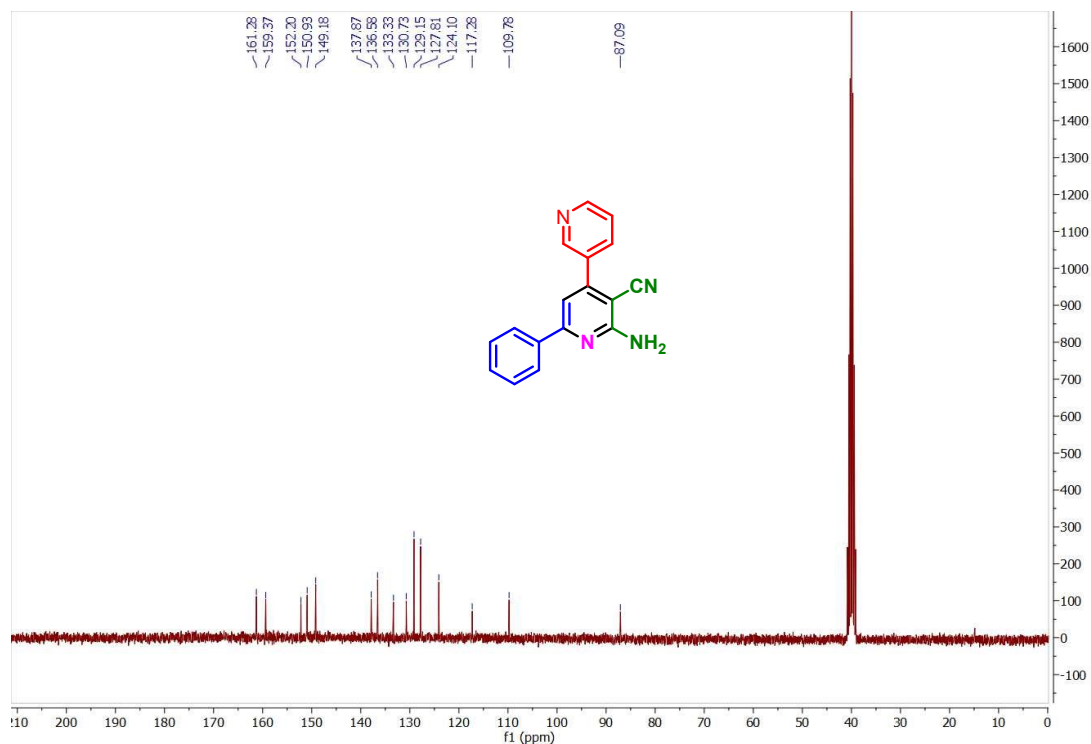

10: FT-IR spectrum of 2-amino-4-(4-chlorophenyl)-6-phenylnicotinonitrile (1d).

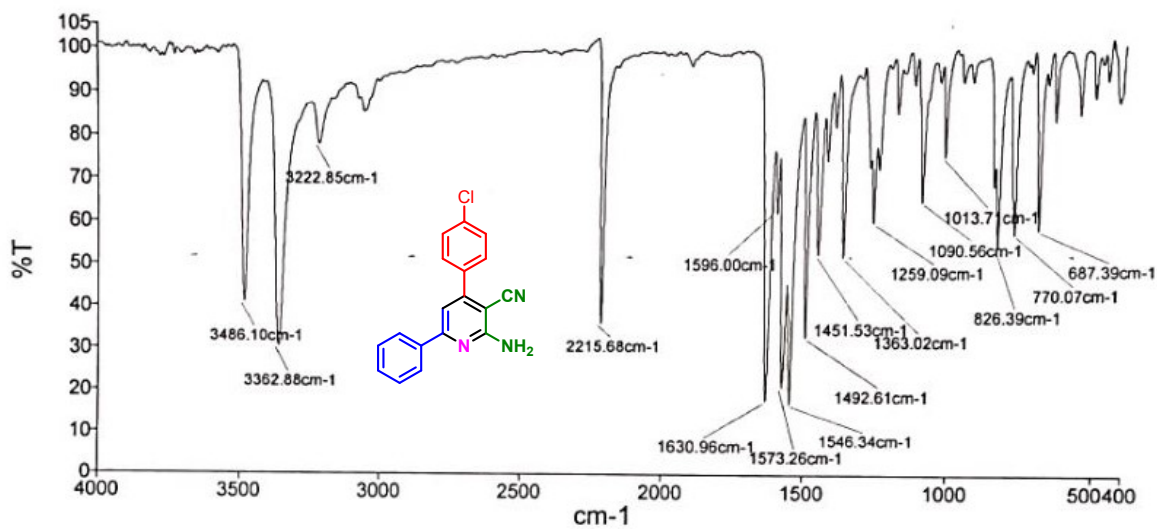

11: <sup>1</sup>H NMR spectrum of 2-amino-4-(4-chlorophenyl)-6-phenylnicotinonitrile (1d).



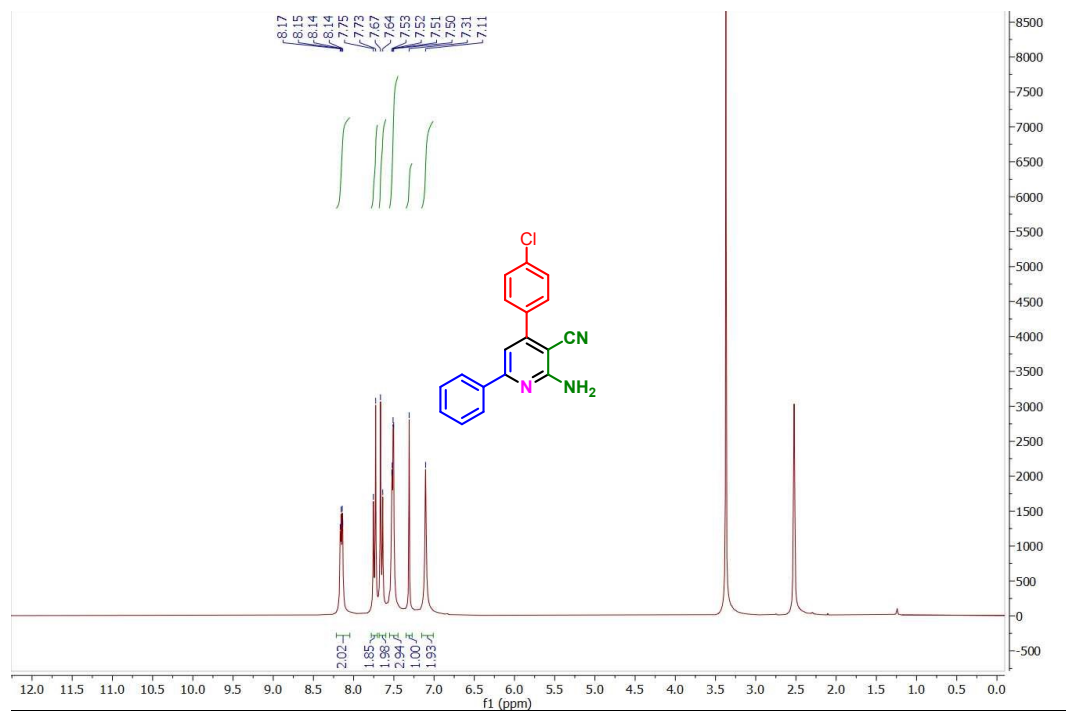

12: <sup>13</sup>C NMR spectrum of 2-amino-4-(4-chlorophenyl)-6-phenylnicotinonitrile (1d).

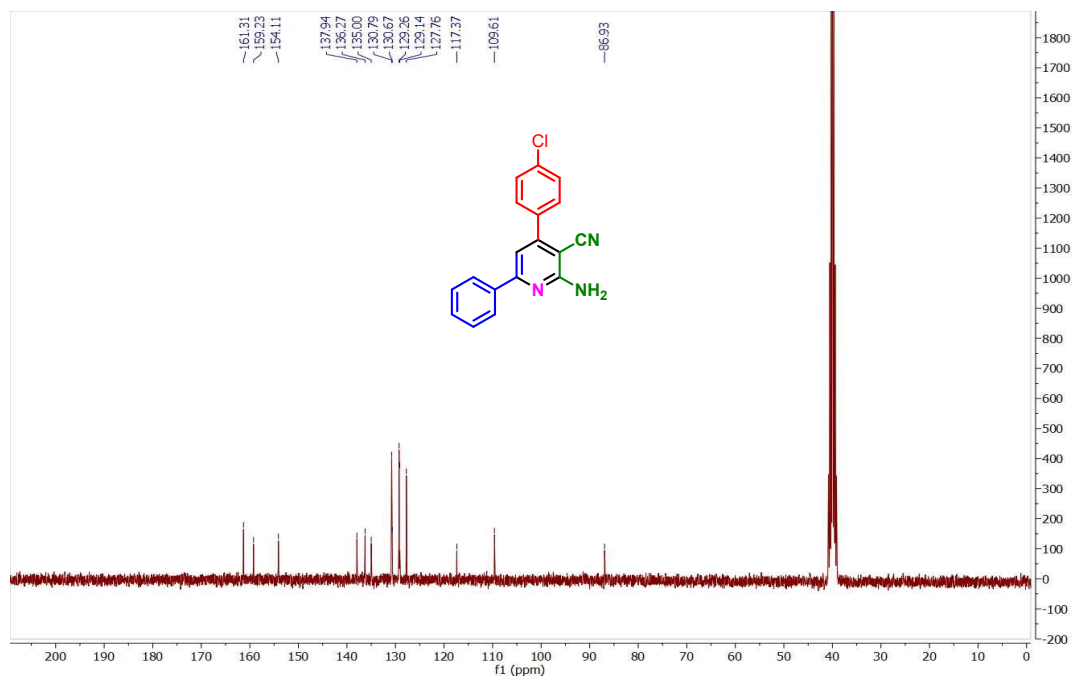

13: FT-IR spectrum of 2-amino-4-(2-chlorophenyl)-6-phenylnicotinonitrile (1e).

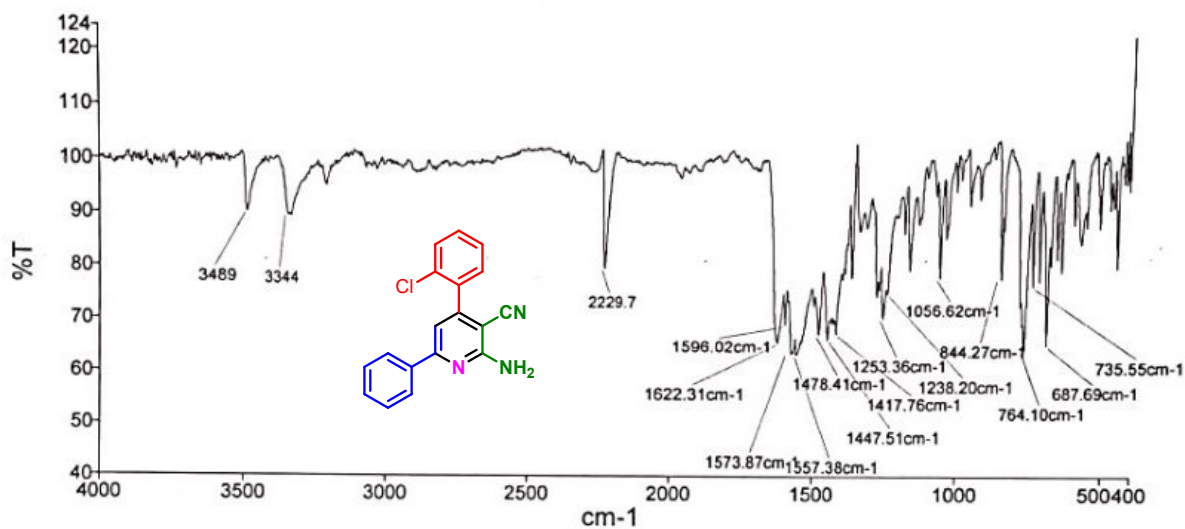

14: <sup>1</sup>H NMR spectrum of 2-amino-4-(2-chlorophenyl)-6-phenylnicotinonitrile (1e).

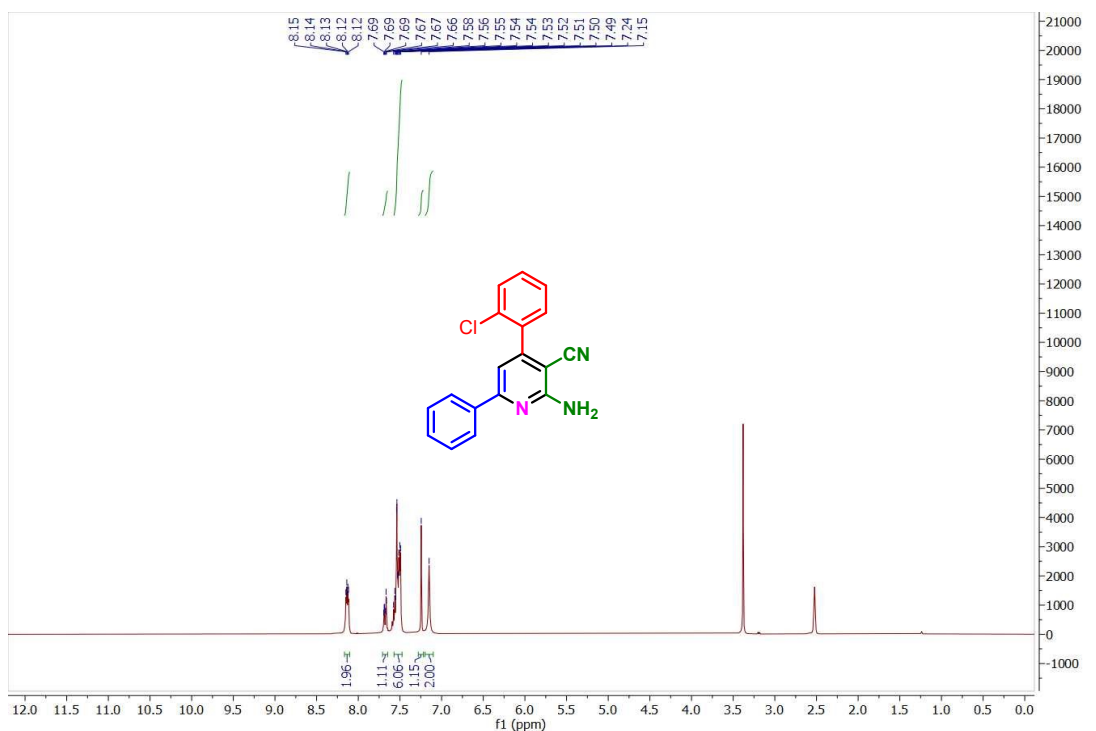

15: <sup>13</sup>C NMR spectrum of 2-amino-4-(2-chlorophenyl)-6-phenylnicotinonitrile (1e).

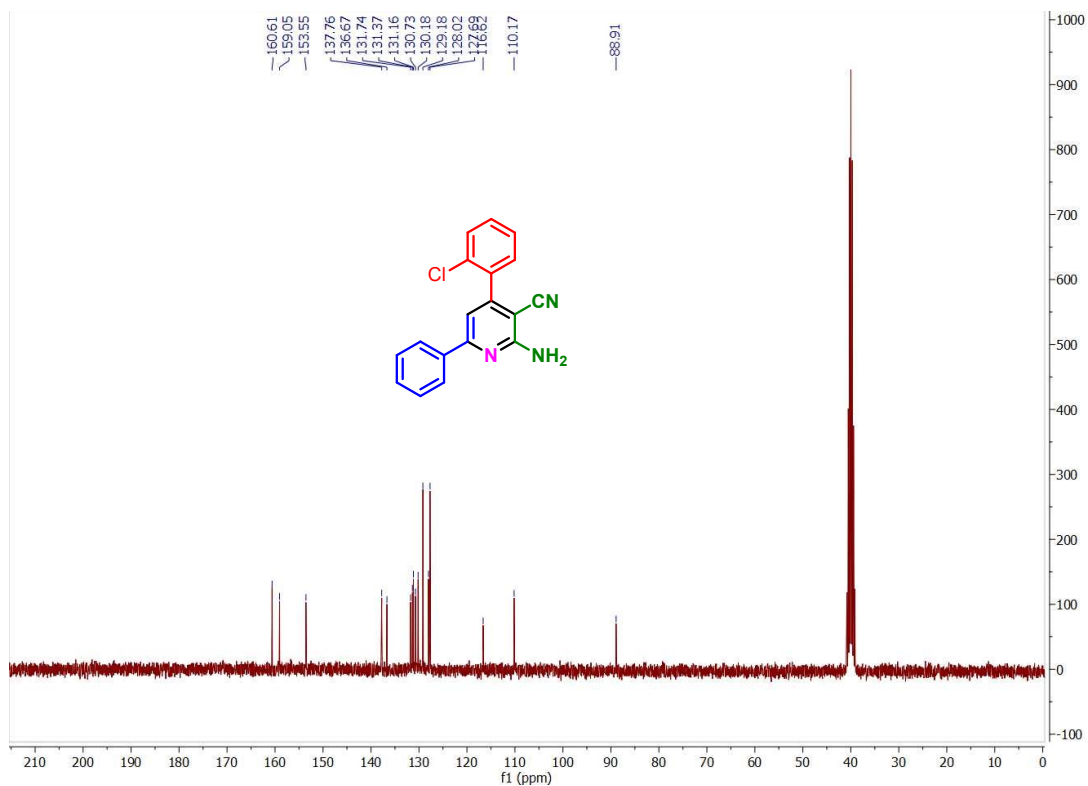

16: FT-IR spectrum of 2-amino-5-methyl-4,6-diphenylnicotinonitrile (1f).

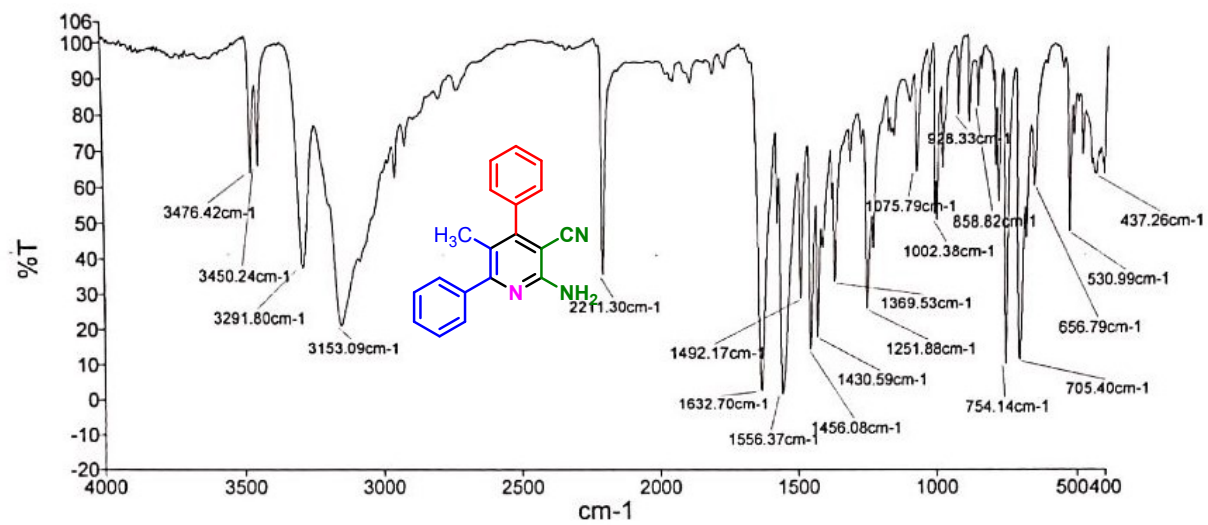

17: <sup>1</sup>H NMR spectrum of 2-amino-5-methyl-4,6-diphenylnicotinonitrile (1f).

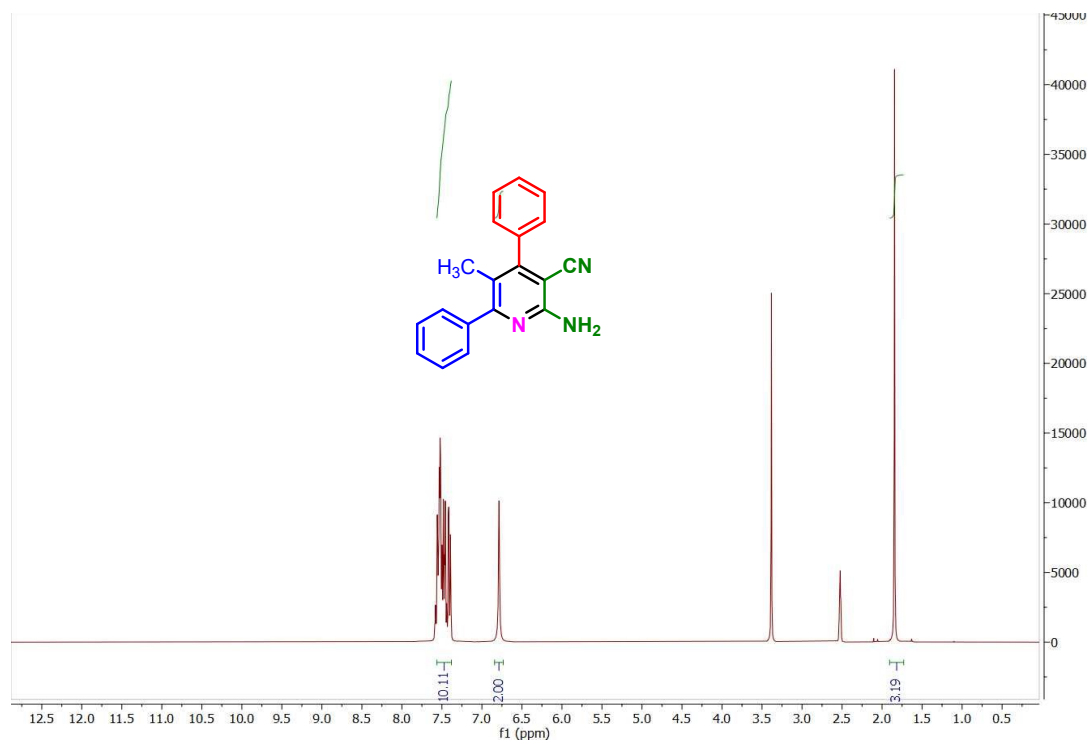

18: <sup>13</sup>C NMR spectrum of 2-amino-5-methyl-4,6-diphenylnicotinonitrile (1f).

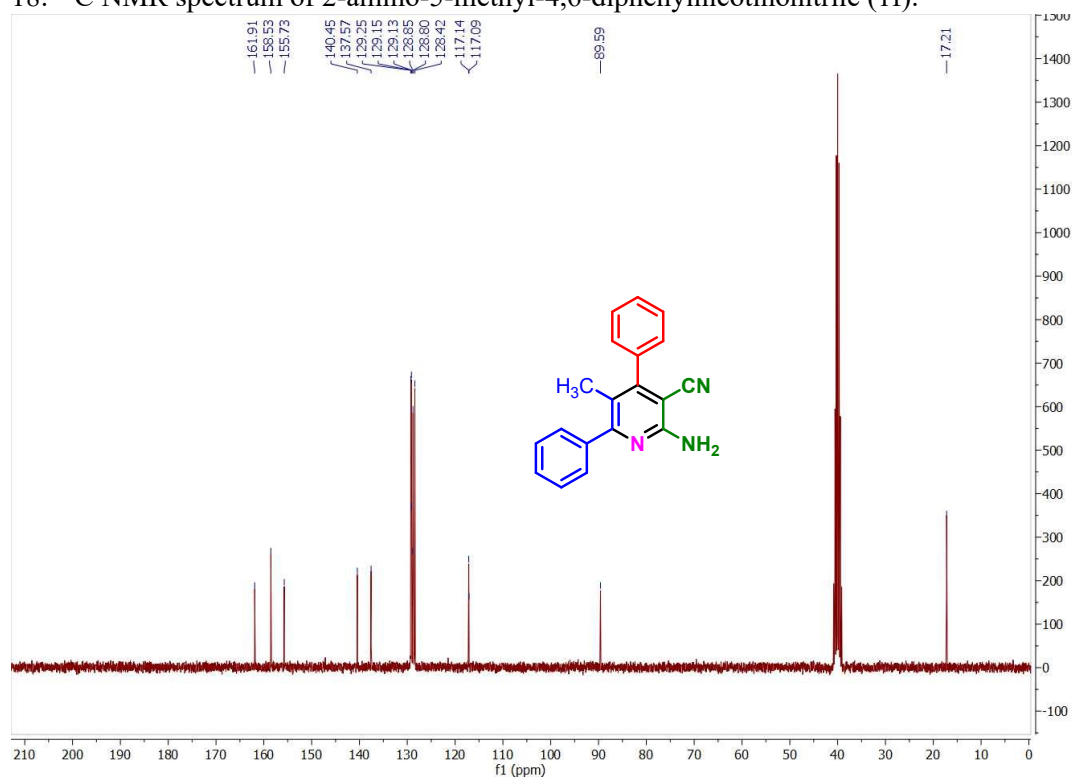

19: FT-IR spectrum of 2'-amino-5'-methyl-6'-phenyl-[3,4'-bipyridine]-3'-carbonitrile (1h).

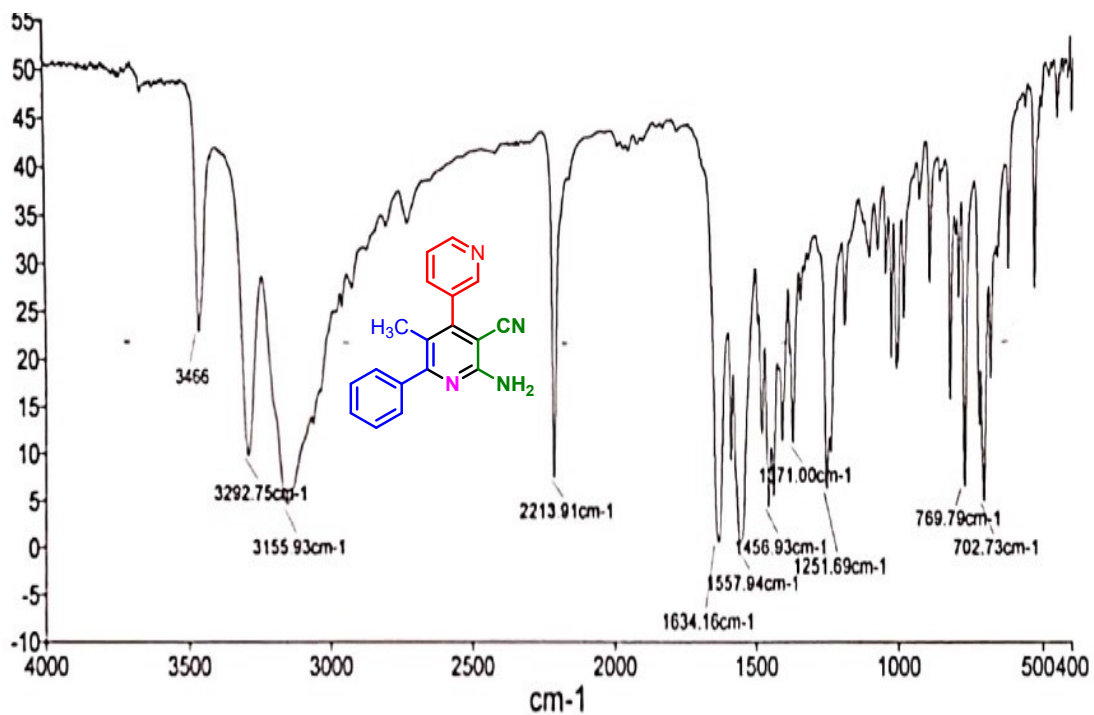

20: <sup>1</sup>H NMR spectrum of 2'-amino-5'-methyl-6'-phenyl-[3,4'-bipyridine]-3'-carbonitrile (1h).

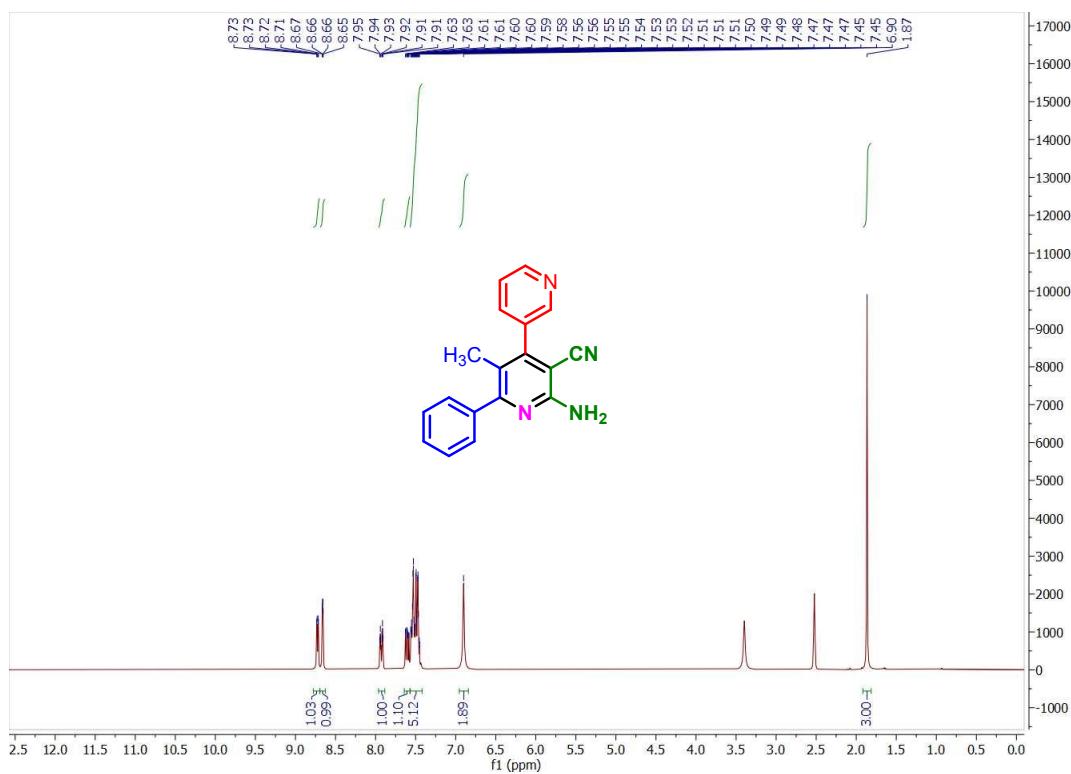

21: <sup>13</sup>C NMR spectrum of 2'-amino-5'-methyl-6'-phenyl-[3,4'-bipyridine]-3'-carbonitrile (1h).

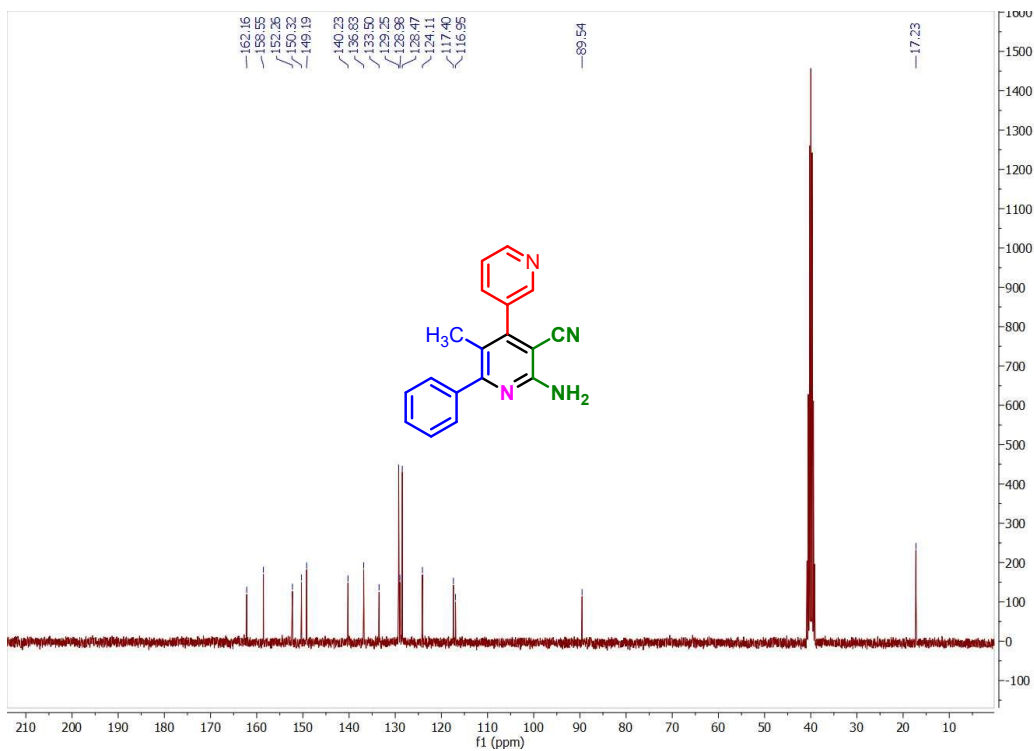

22: FT-IR spectrum of 2-amino-4-(4-isopropylphenyl)-5-methyl-6-phenylnicotinonitrile (1g).

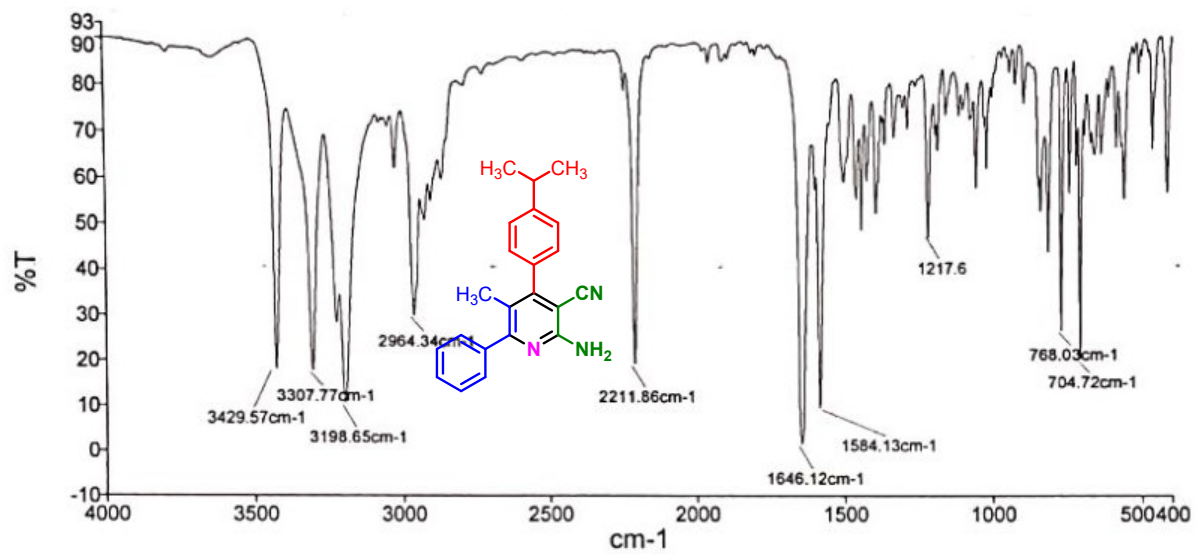

23:  $^1\text{H}$  NMR spectrum of 2-amino-4-(4-isopropylphenyl)-5-methyl-6-phenylnicotinonitrile (1g).

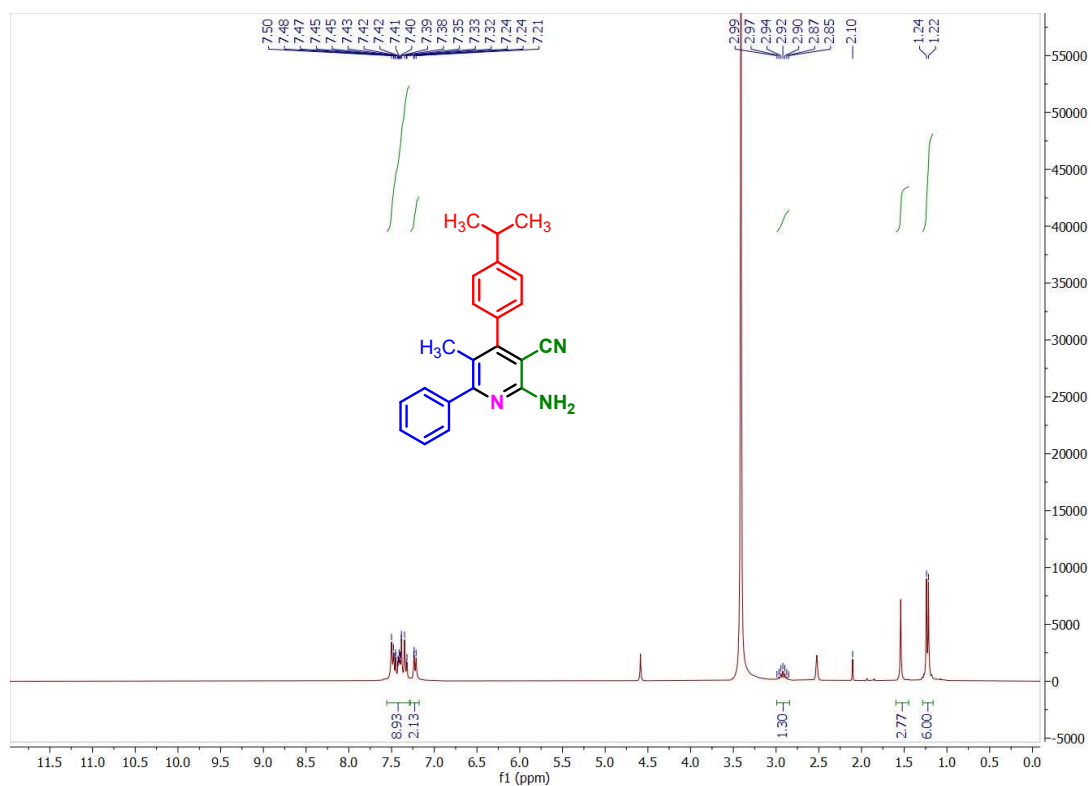

24: Mass spectrum of 2-amino-4-(4-isopropylphenyl)-5-methyl-6-phenylnicotinonitrile (1g).

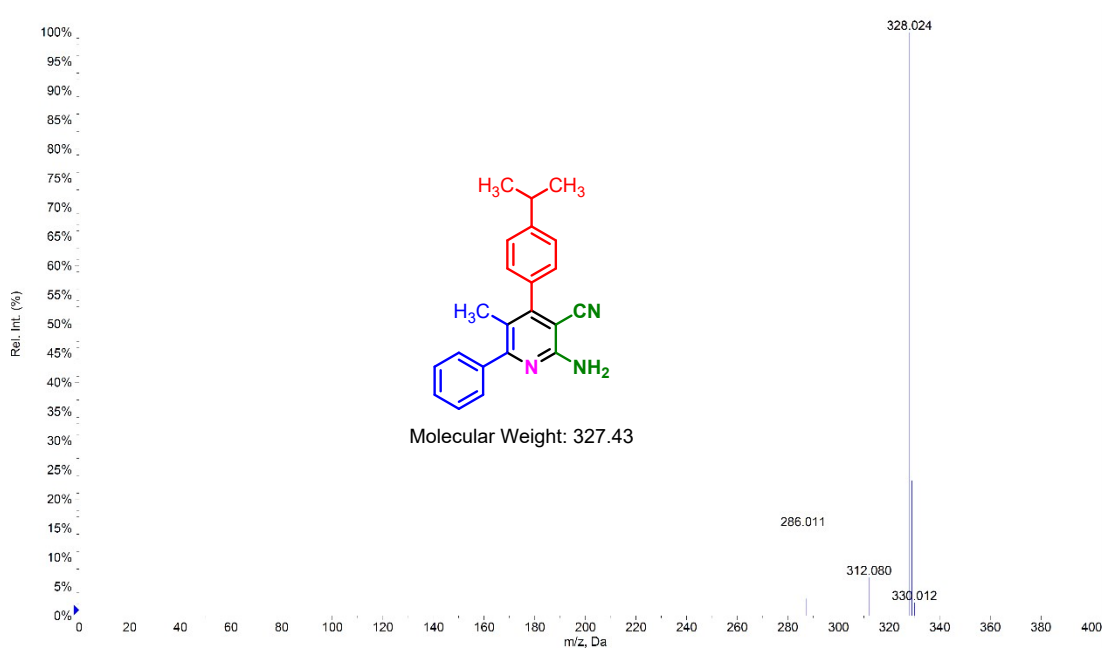

25: FT-IR spectrum of 2-amino-4-(4-hydroxyphenyl)-6-(naphthalen-2-yl)nicotinonitrile (1i).

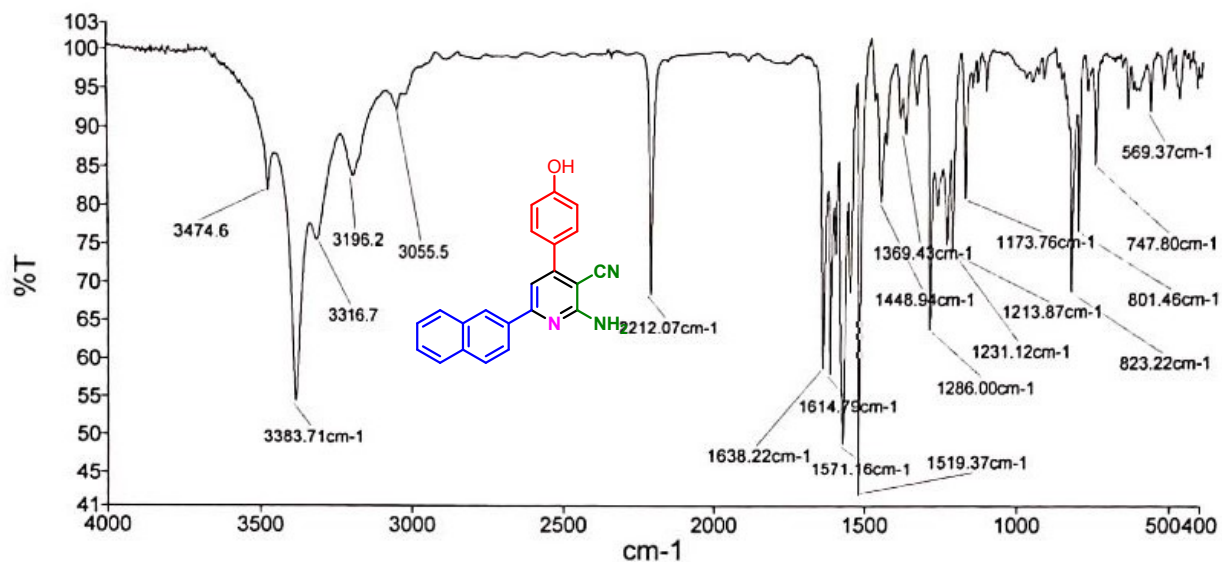

26: <sup>1</sup>H NMR spectrum of 2-amino-4-(4-hydroxyphenyl)-6-(naphthalen-2-yl)nicotinonitrile (1i).

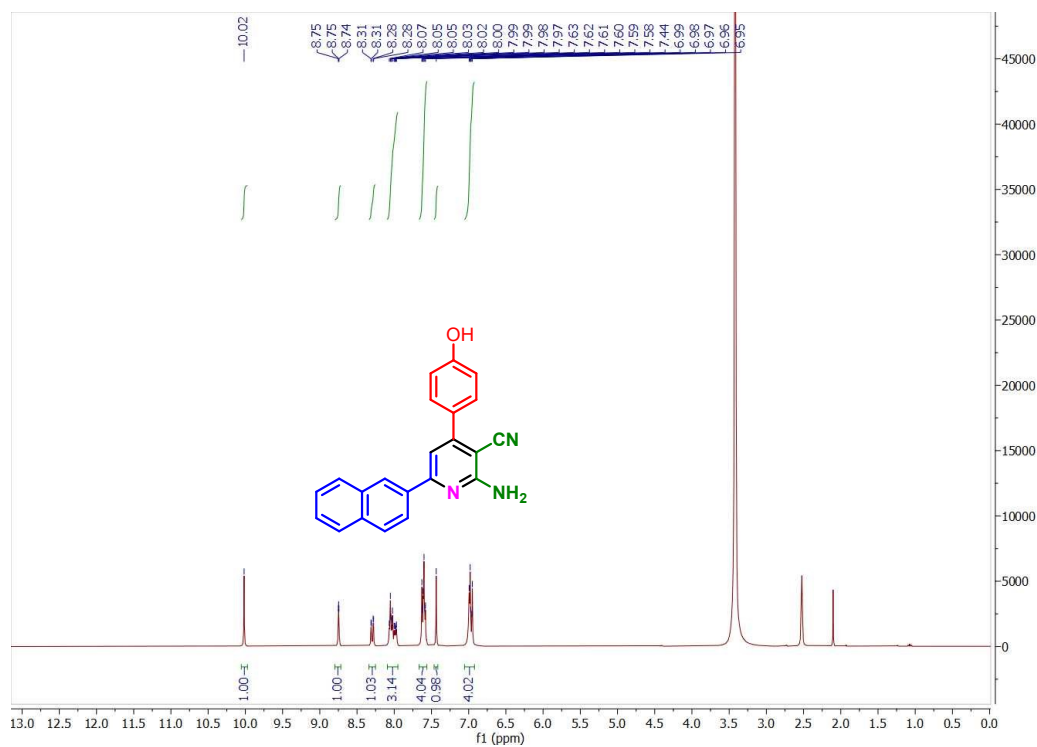

27: <sup>13</sup>C NMR spectrum of 2-amino-4-(4-hydroxyphenyl)-6-(naphthalen-2-yl)nicotinonitrile (1i).



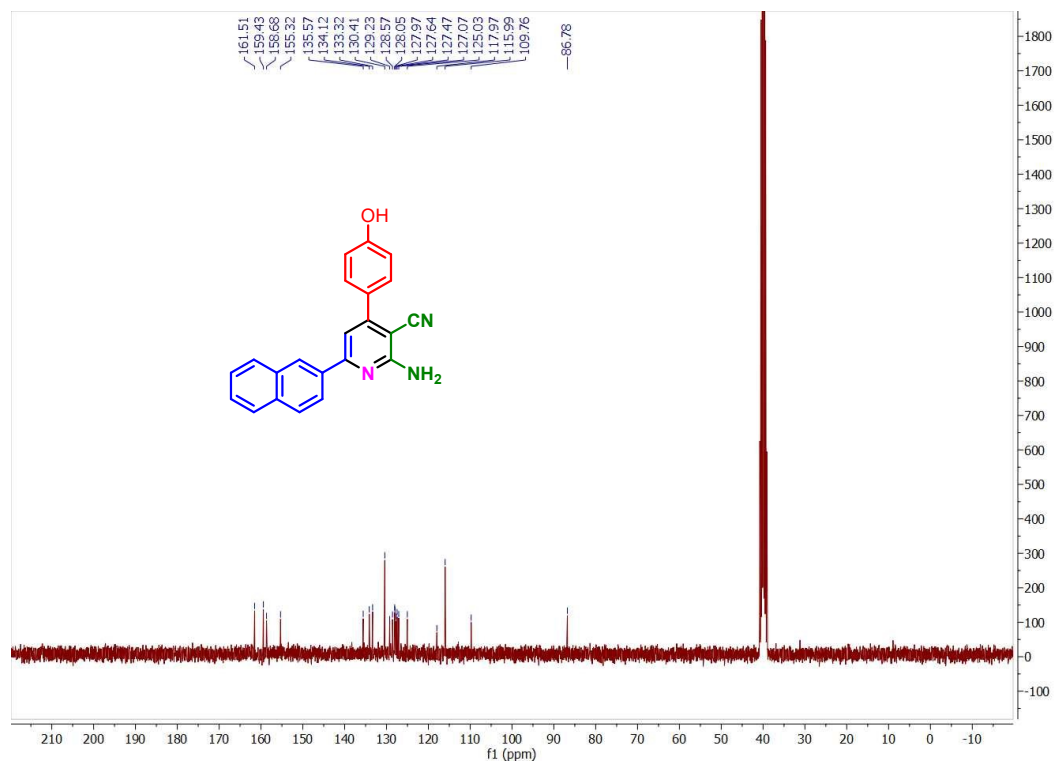

28: Mass spectrum of 2-amino-4-(4-hydroxyphenyl)-6-(naphthalen-2-yl)nicotinonitrile (1i).

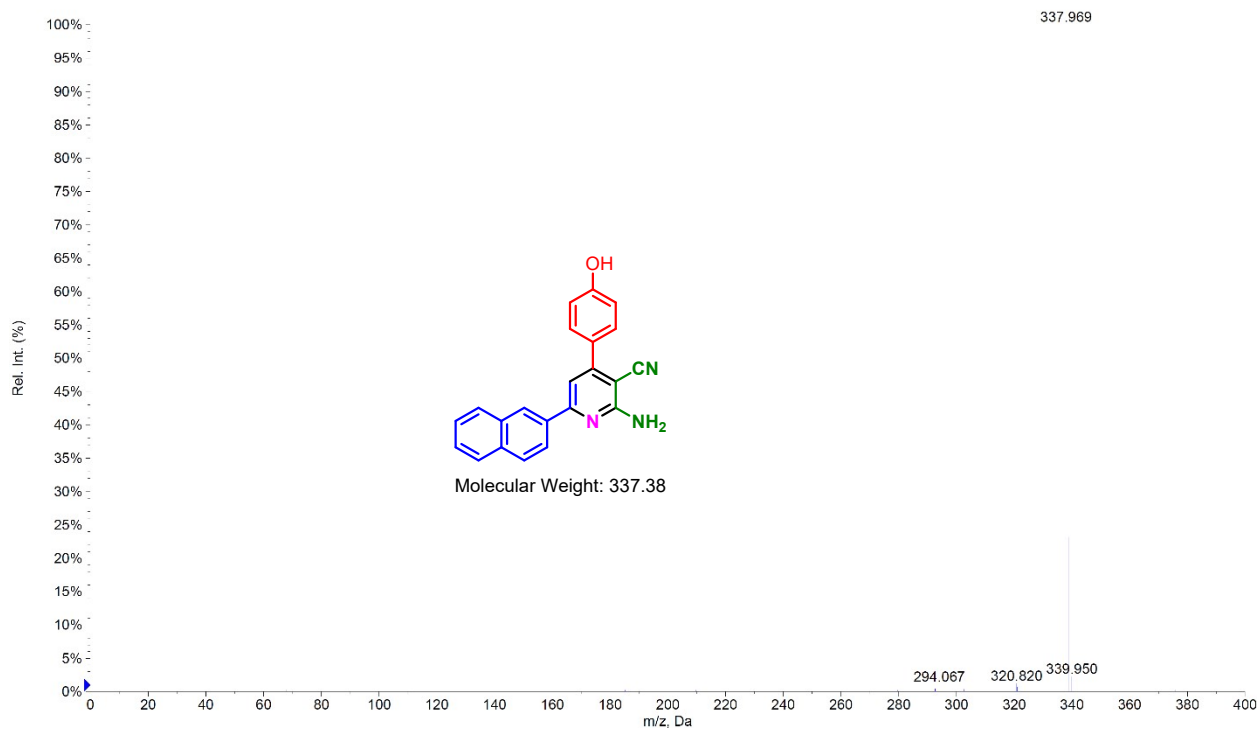

29: FT-IR spectrum of 2-amino-4-(4-chlorophenyl)-6-(naphthalen-2-yl)nicotinonitrile (1j).

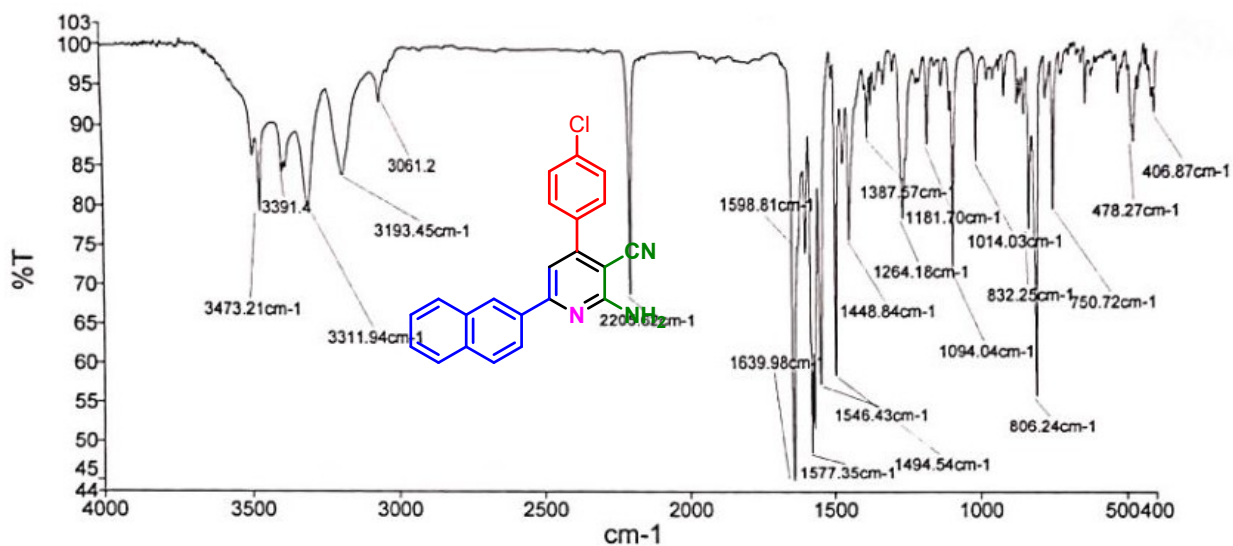

30: FT-IR spectrum of 2-amino-4-(2-chlorophenyl)-6-(naphthalen-2-yl)nicotinonitrile (1k).

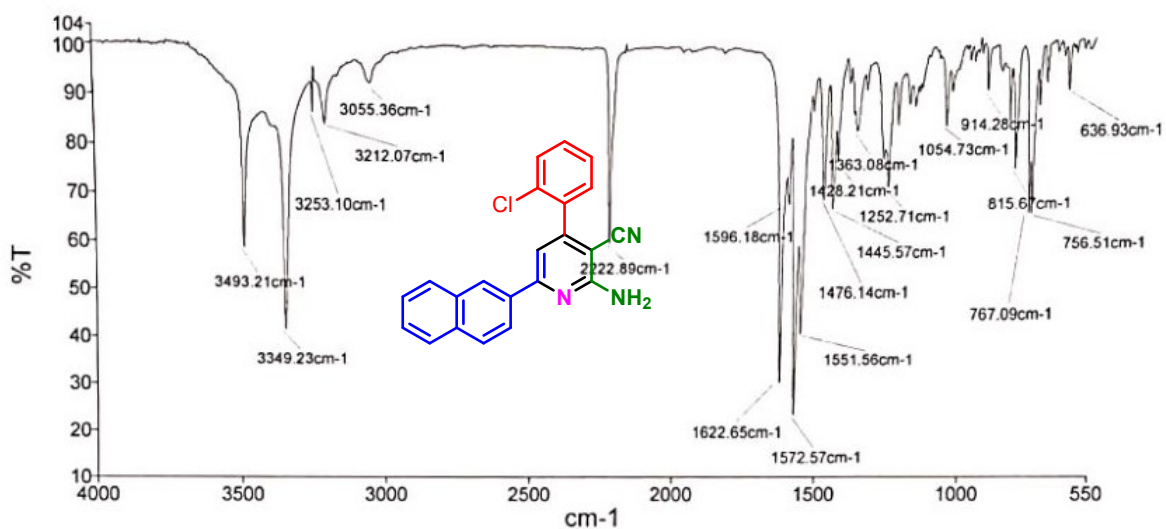

31:  $^1\text{H}$  NMR spectrum of 2-amino-4-(2-chlorophenyl)-6-(naphthalen-2-yl)nicotinonitrile (1k).

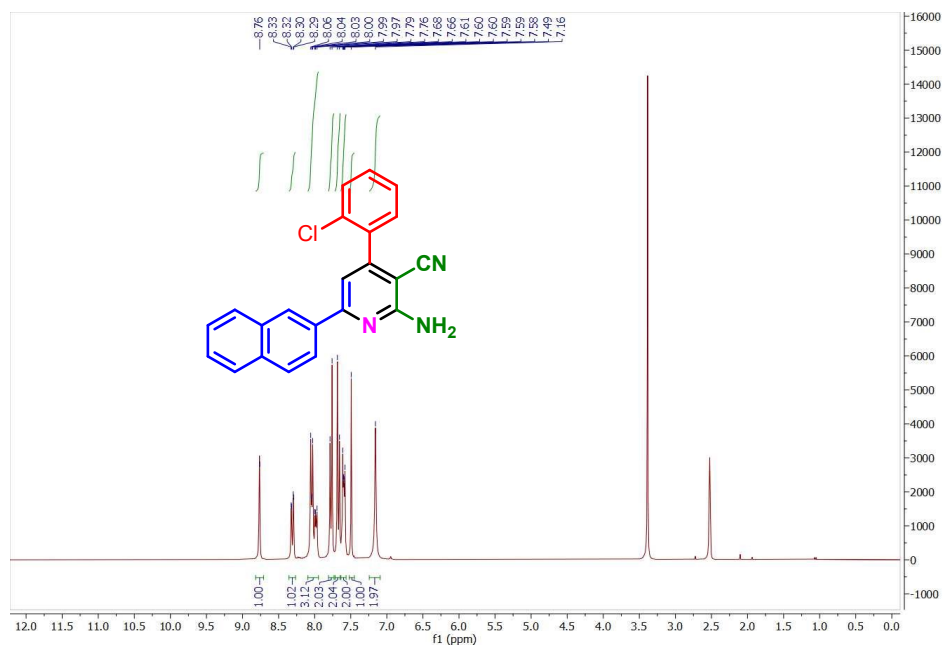

32:  $^{13}\text{C}$  NMR spectrum of 2-amino-4-(2-chlorophenyl)-6-(naphthalen-2-yl)nicotinonitrile (1k).

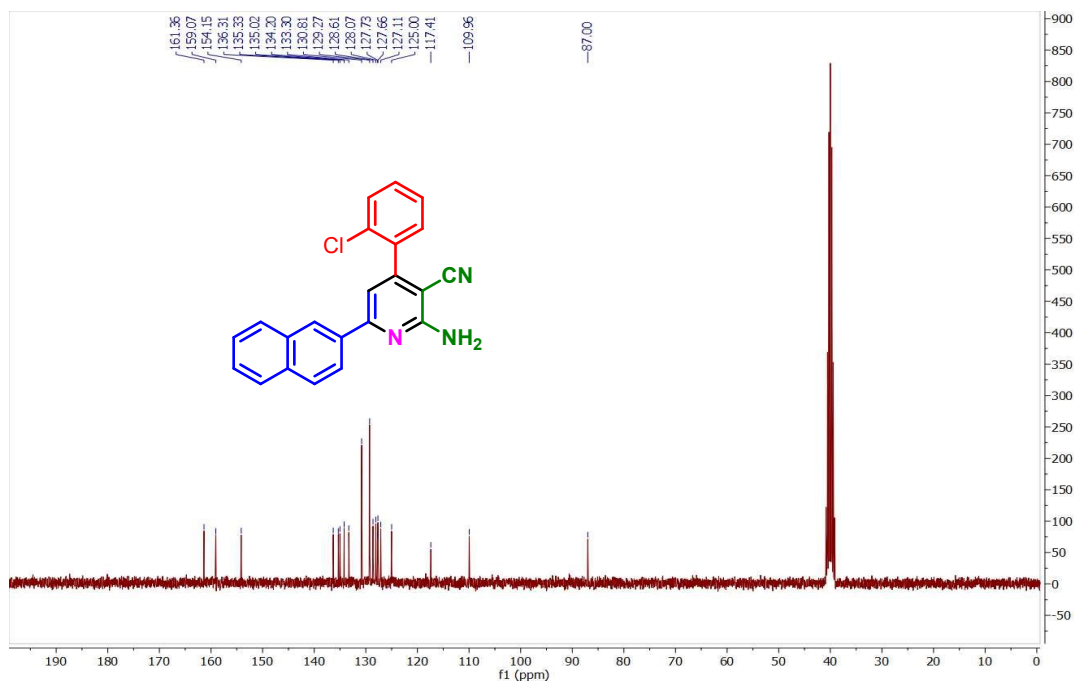

33: Mass spectrum of 2-amino-4-(2-chlorophenyl)-6-(naphthalen-2-yl)nicotinonitrile (1k).

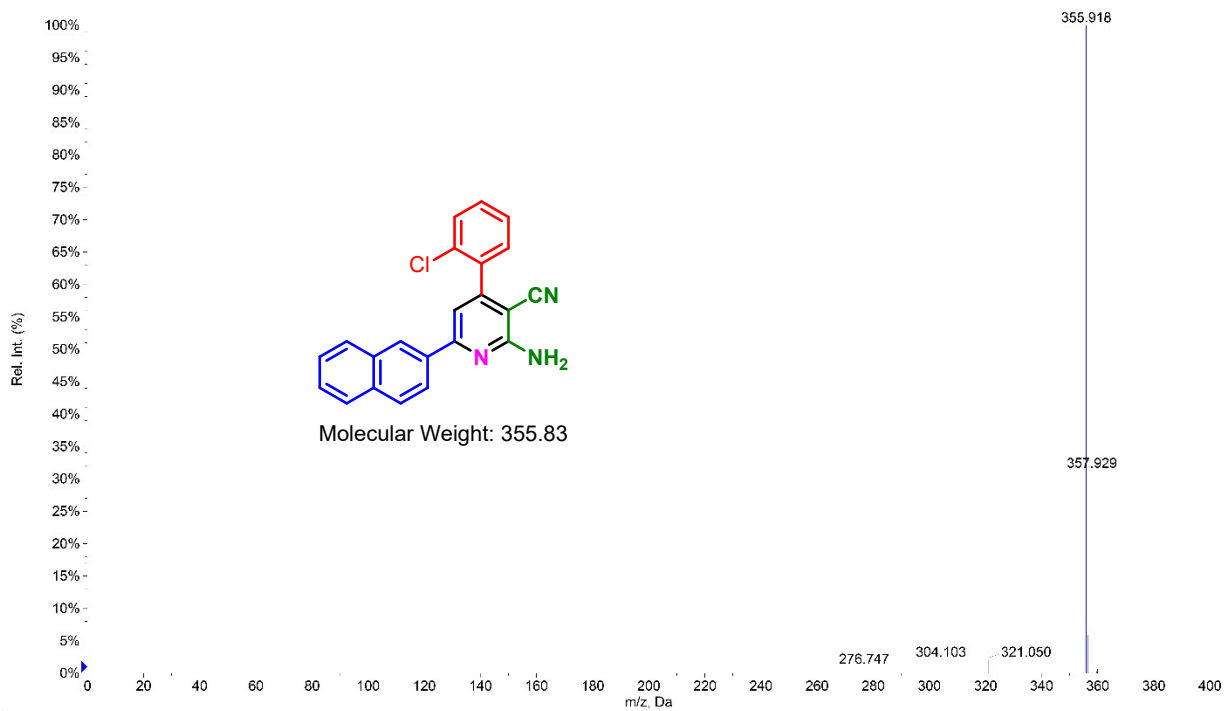

34: FT-IR spectrum of 2-amino-4-(4-nitrophenyl)-6-(naphthalen-2-yl)nicotinonitrile (11).

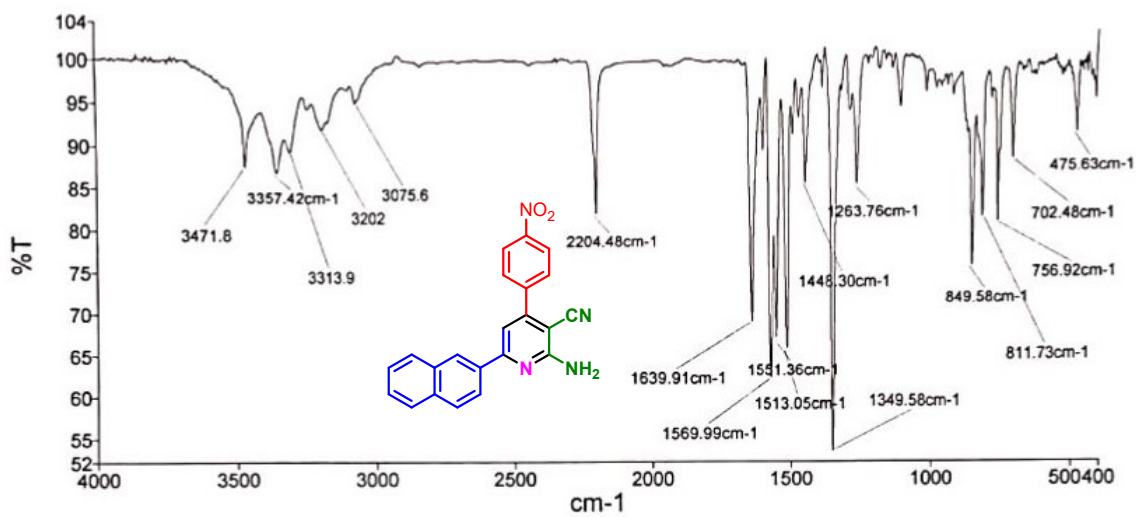



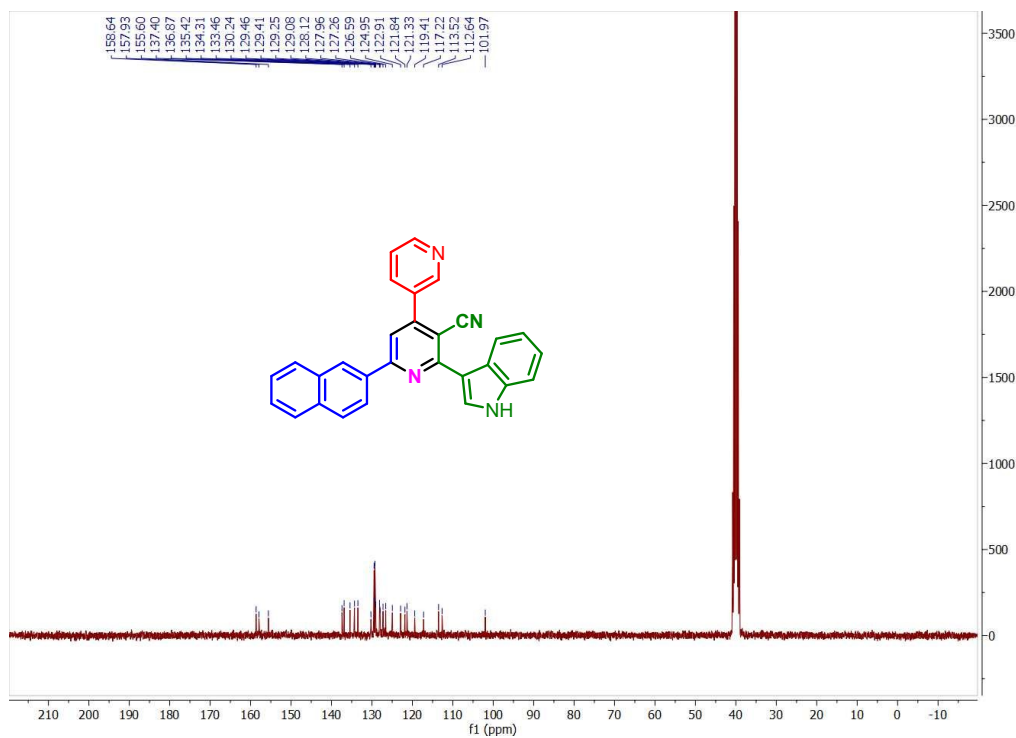

38: Mass spectrum of 2'-(1H-indol-3-yl)-6'-(naphthalen-2-yl)-[3,4'-bipyridine]-3'-carbonitrile (1m).

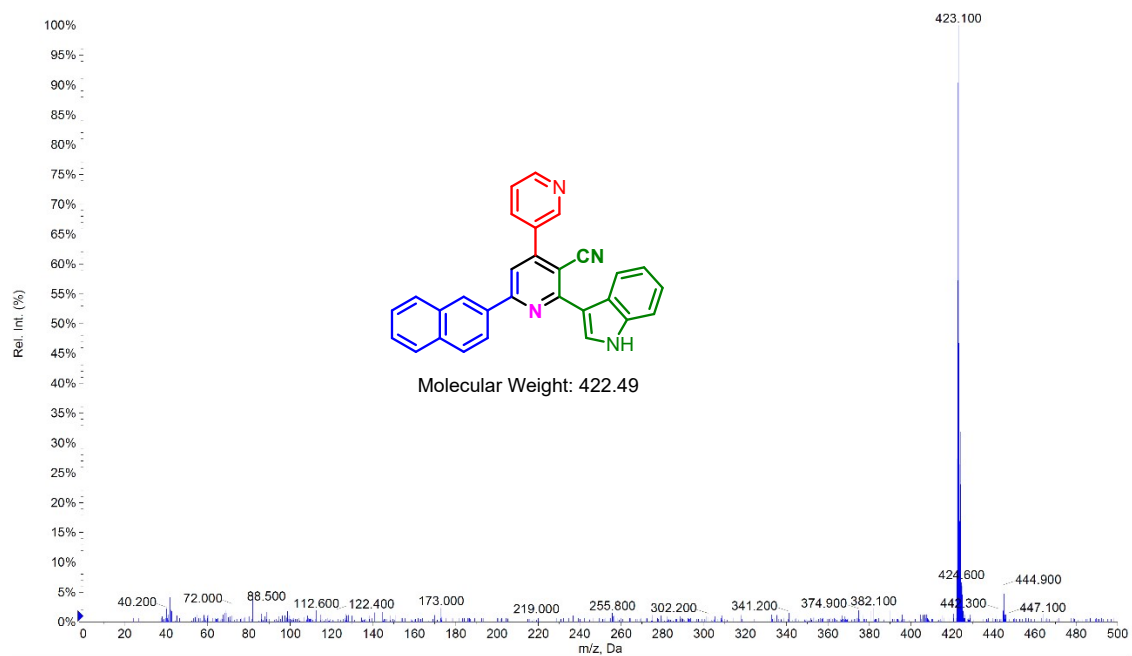

39: FT-IR spectrum of 2,4,6-triphenylpyridine (2a).

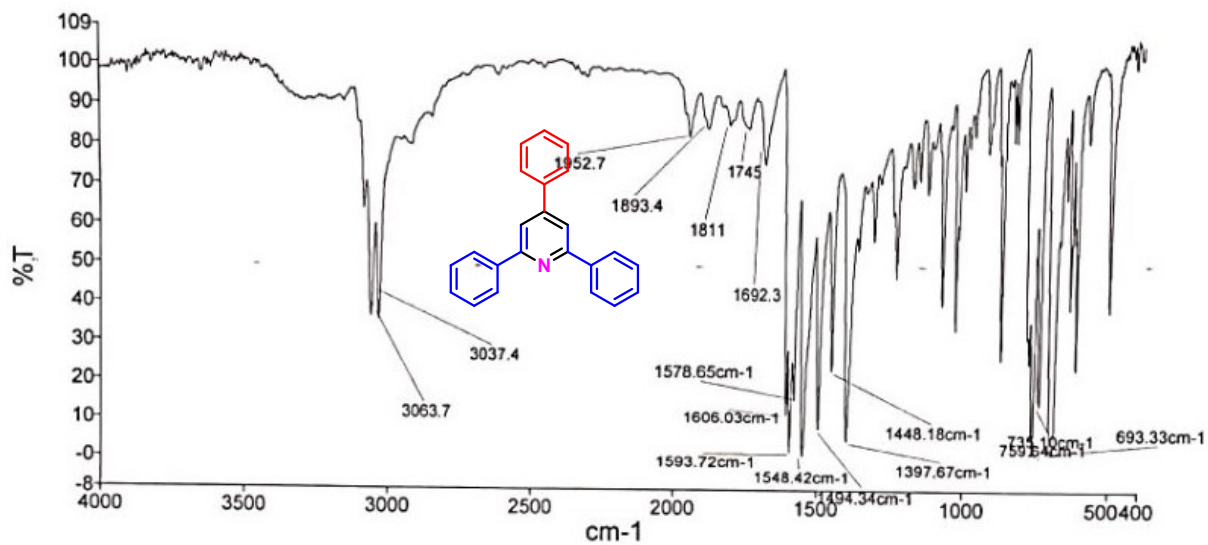

40:  $^1\text{H}$  NMR spectrum of 2,4,6-triphenylpyridine (2a).

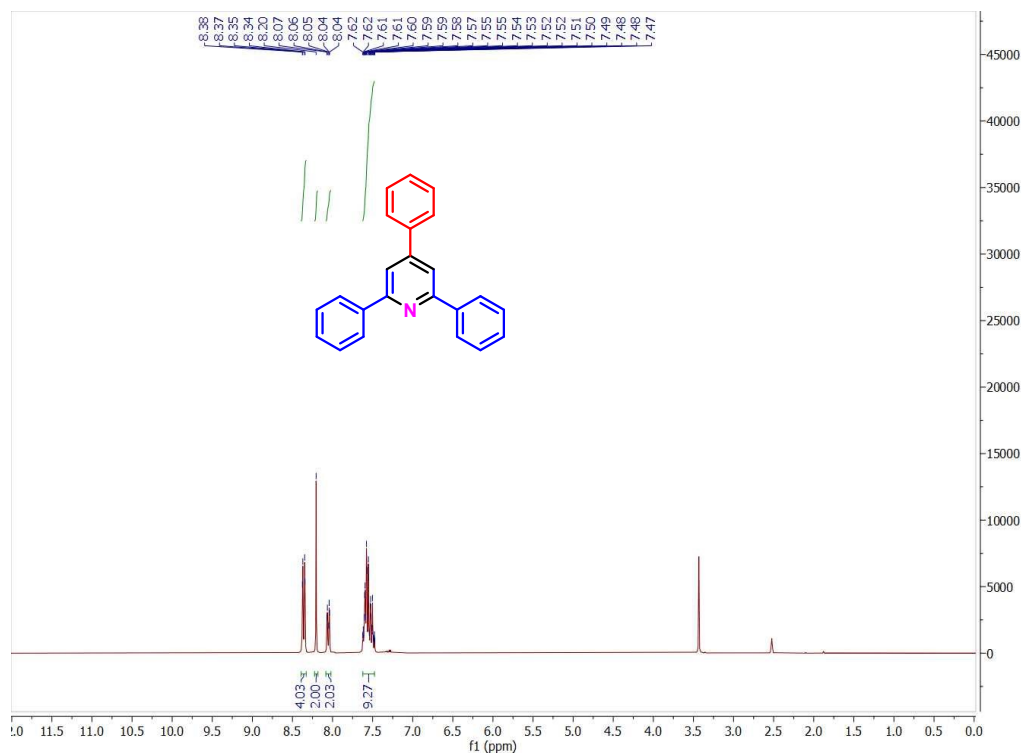

41:  $^{13}\text{C}$  NMR spectrum of 2,4,6-triphenylpyridine (2a).

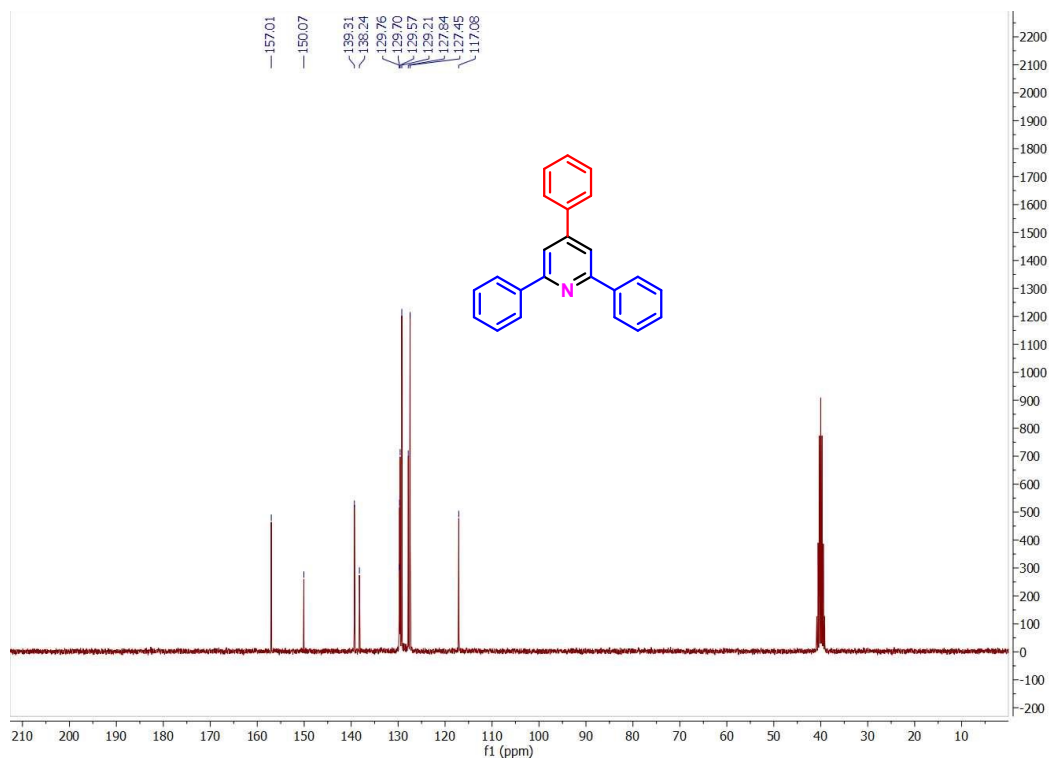

42: FT-IR spectrum of 2,6-diphenyl-4,4'-bipyridine (2b).

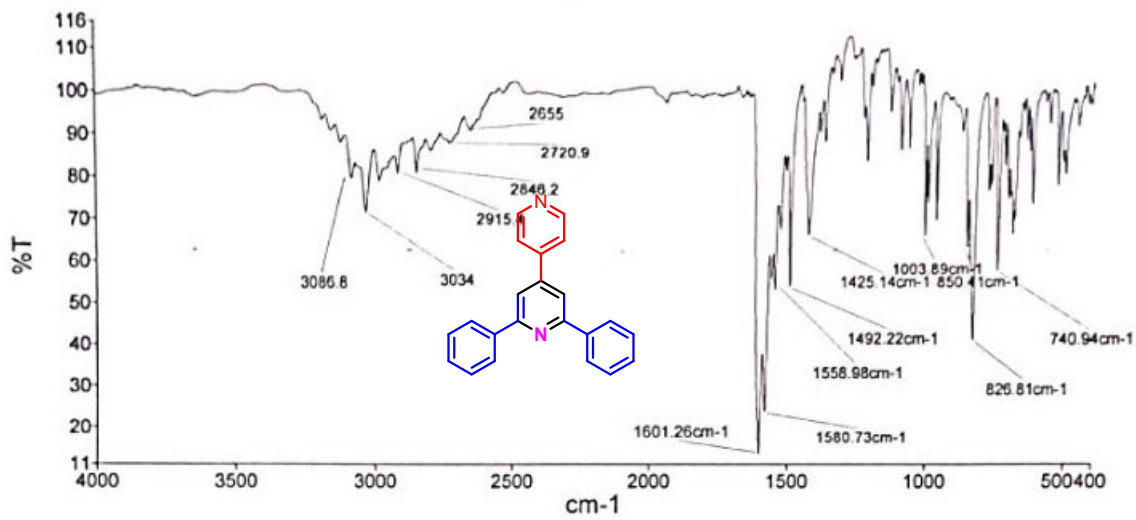

43: FT-IR spectrum of 2,6-diphenyl-4,3'-bipyridine (2c).



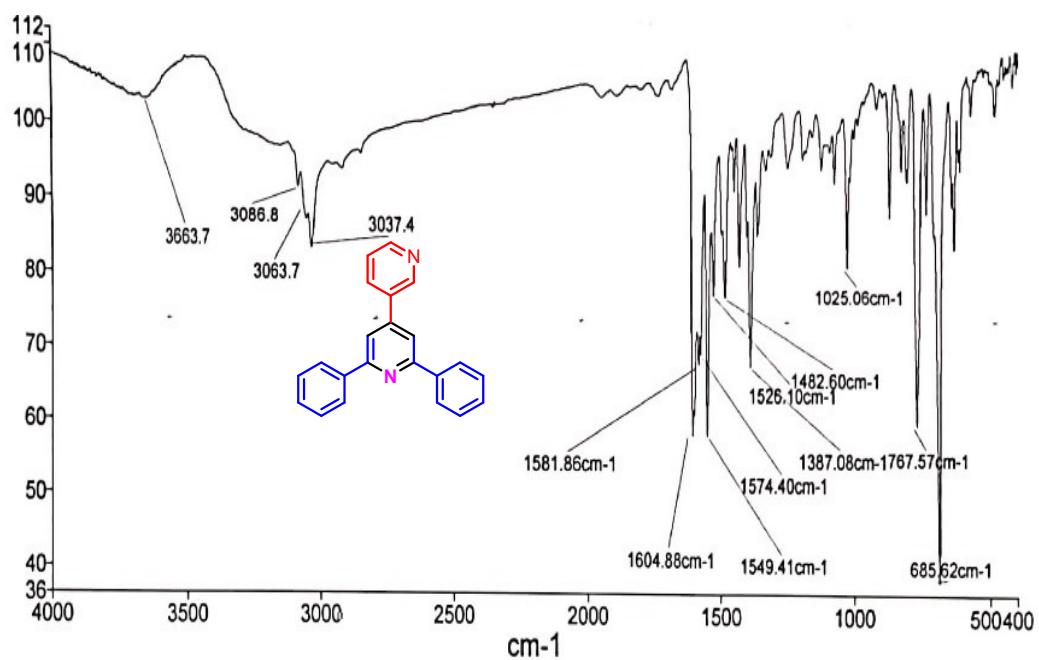

44: Mass spectrum of 2,6-diphenyl-4,3'-bipyridine (2c).

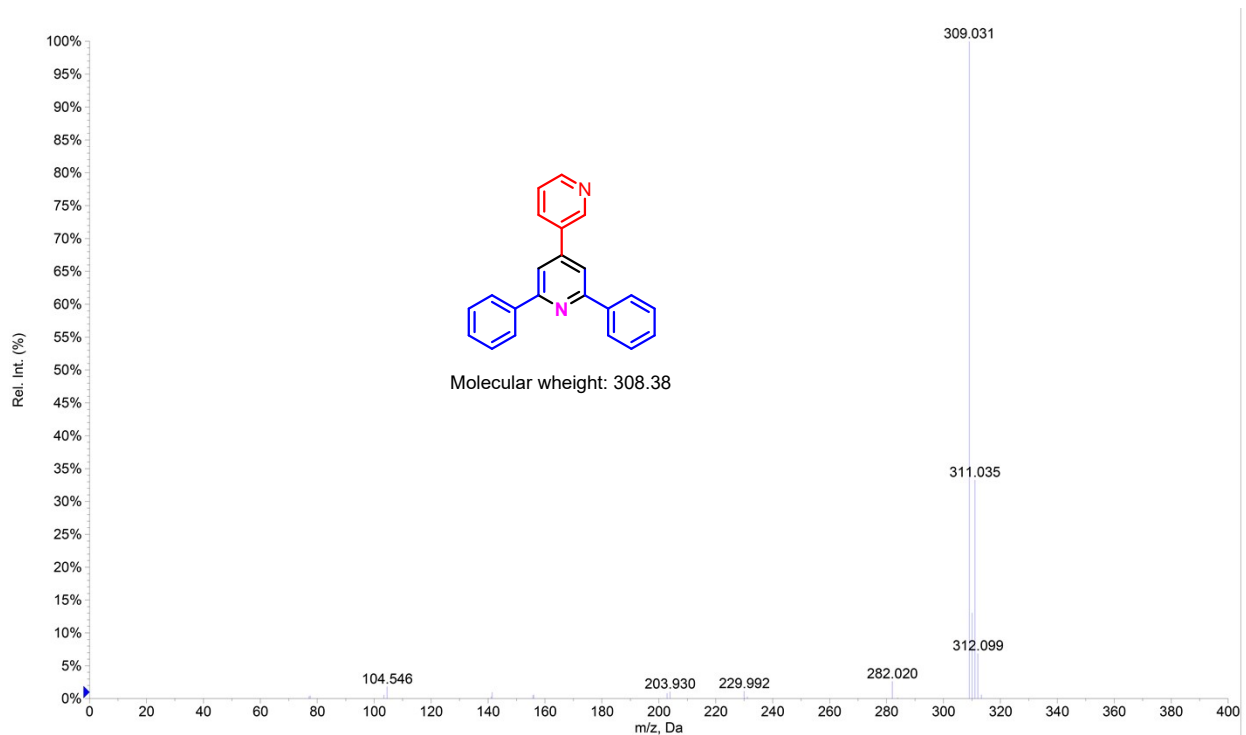

45: FT-IR spectrum of 4-(4-chlorophenyl)-2,6-diphenylpyridine (2d).

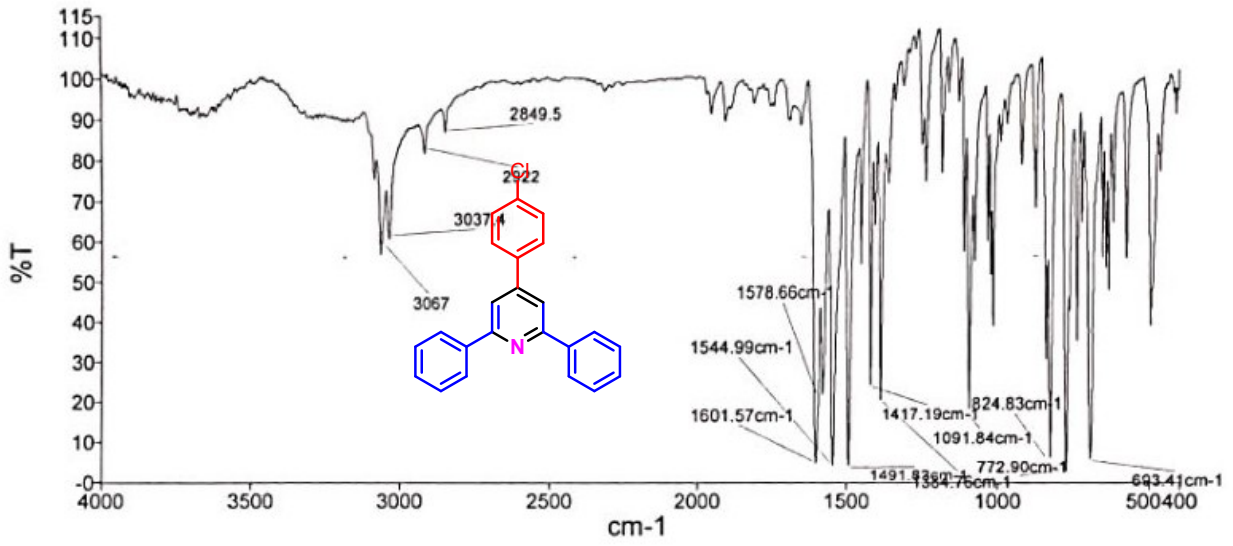

46: <sup>1</sup>H NMR spectrum of 4-(4-chlorophenyl)-2,6-diphenylpyridine (2d).

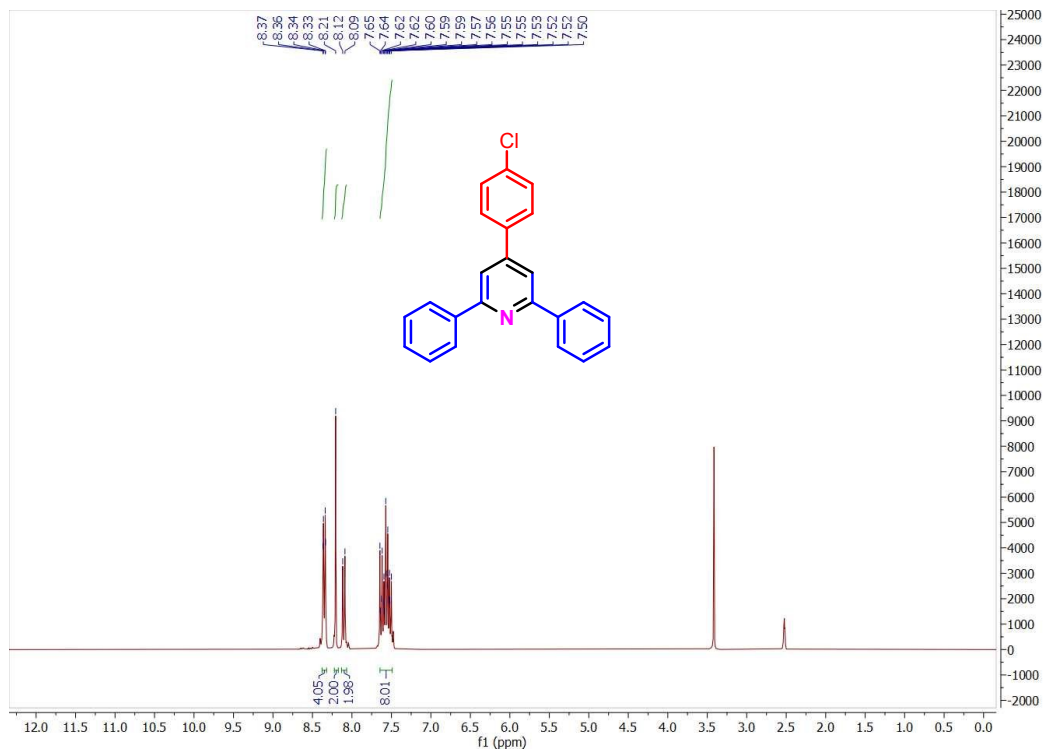

47: <sup>13</sup>C NMR spectrum of 4-(4-chlorophenyl)-2,6-diphenylpyridine (2d).

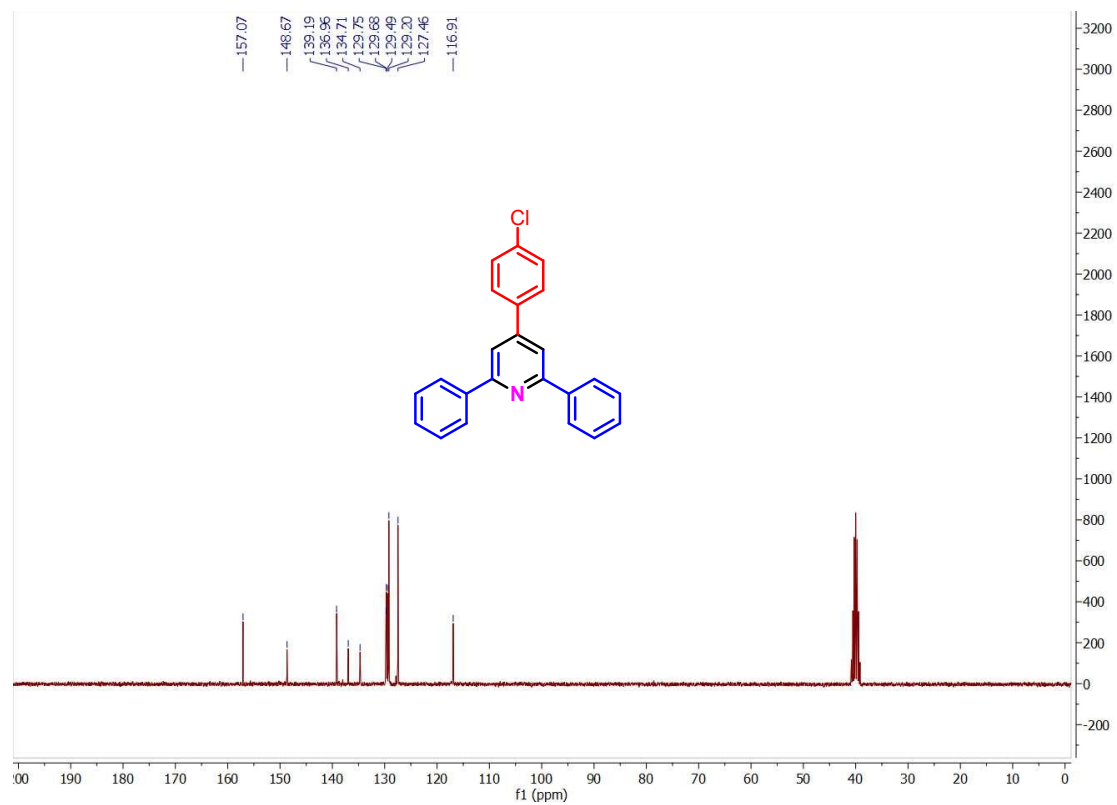

48: FT-IR spectrum of 3,5-dimethyl-2,4,6-triphenylpyridine (2e).

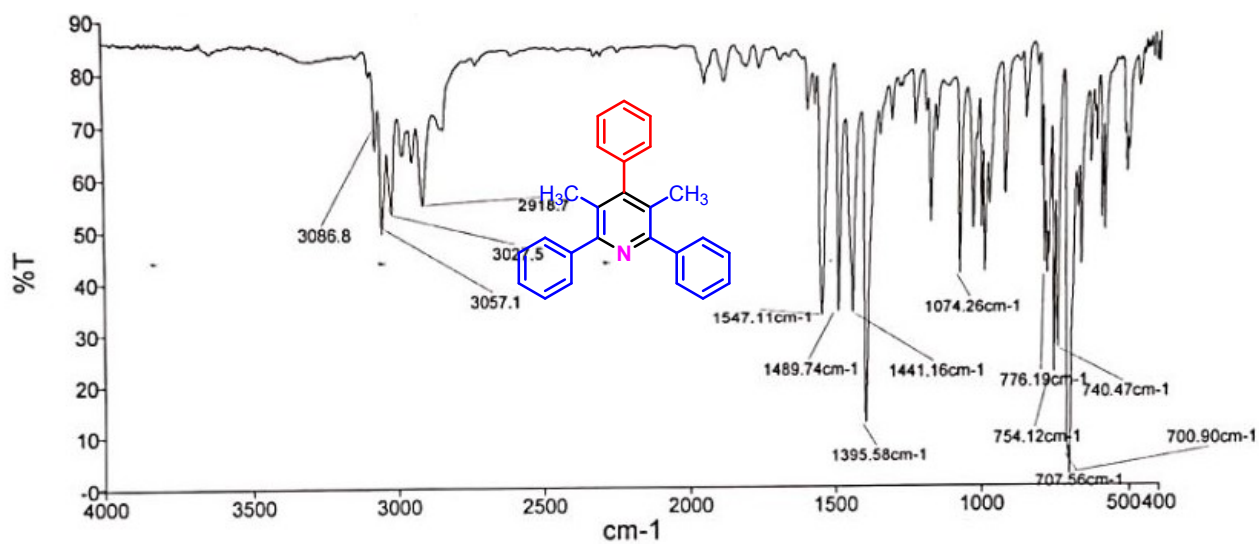

49: Mass spectrum of 3,5-dimethyl-2,4,6-triphenylpyridine (2e).

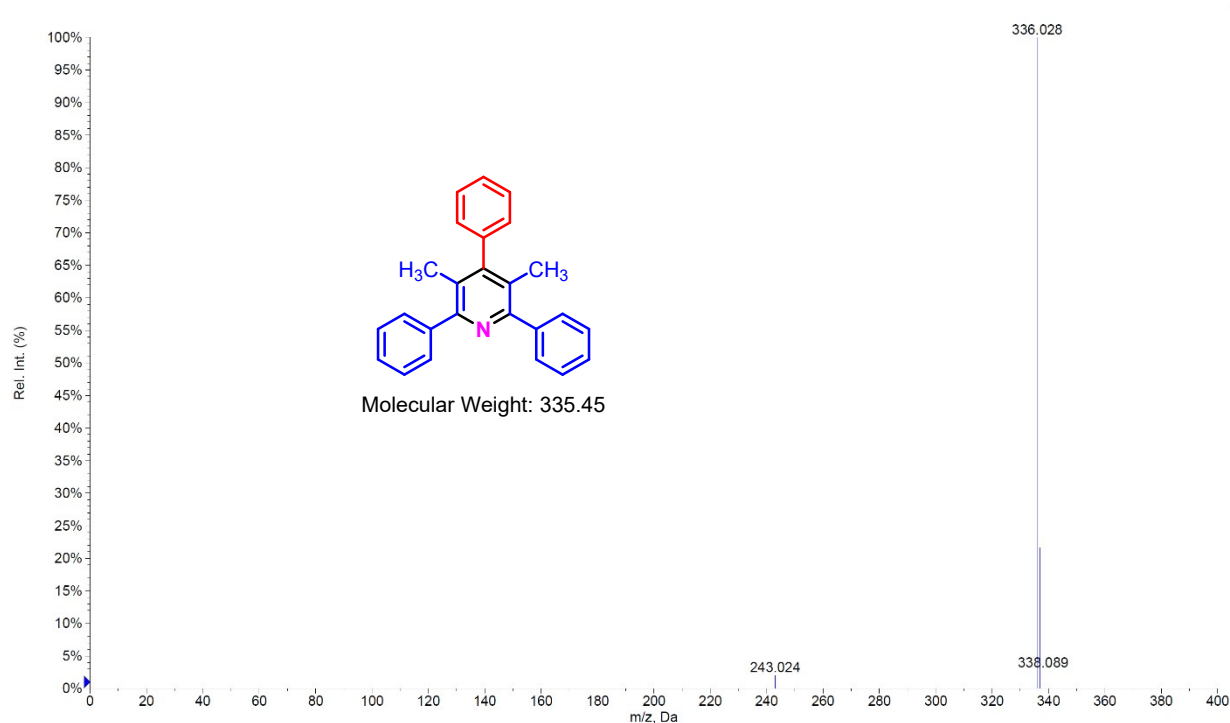

50: FT-IR spectrum of 2,6-di(naphthalen-2-yl)-4-(*p*-tolyl)pyridine (2f).

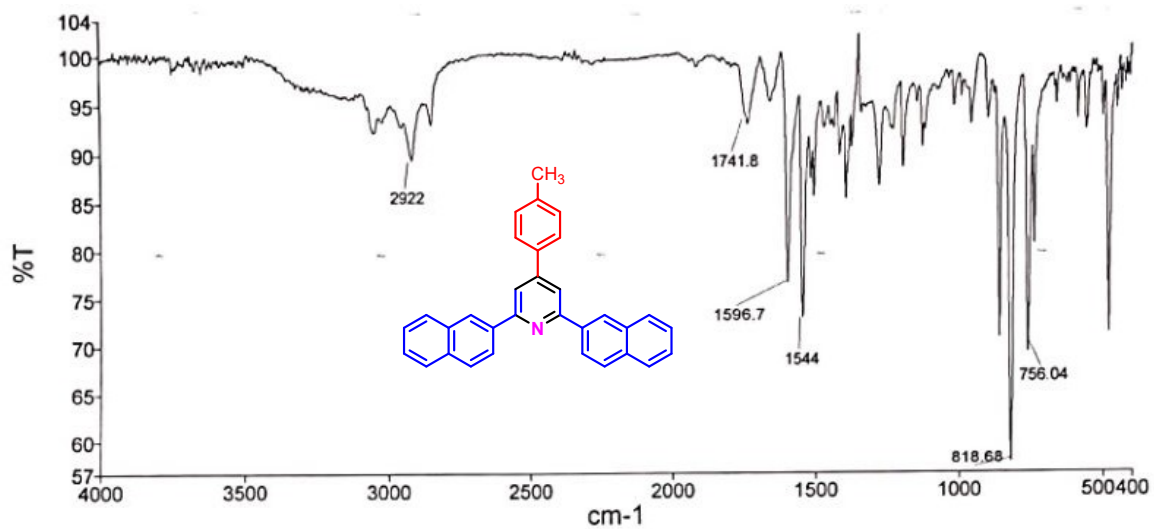

51: <sup>1</sup>H NMR spectrum of 2,6-di(naphthalen-2-yl)-4-(*p*-tolyl)pyridine (2f).

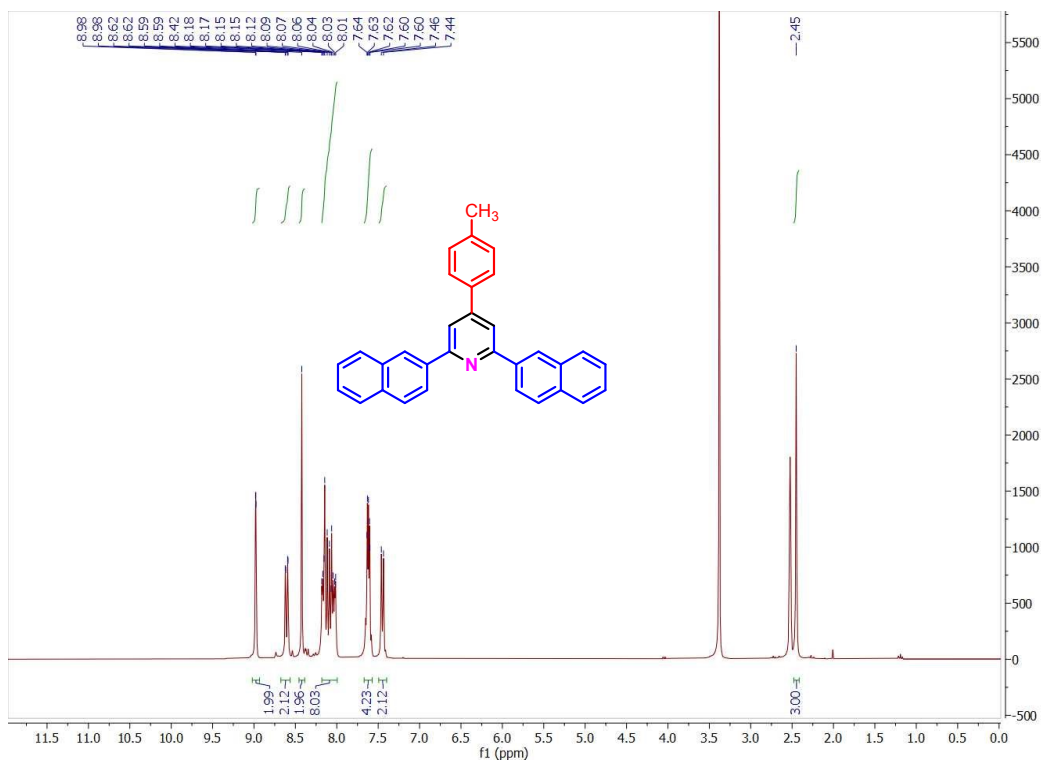

52: <sup>13</sup>C NMR spectrum of 2,6-di(naphthalen-2-yl)-4-(p-tolyl)pyridine (2f).

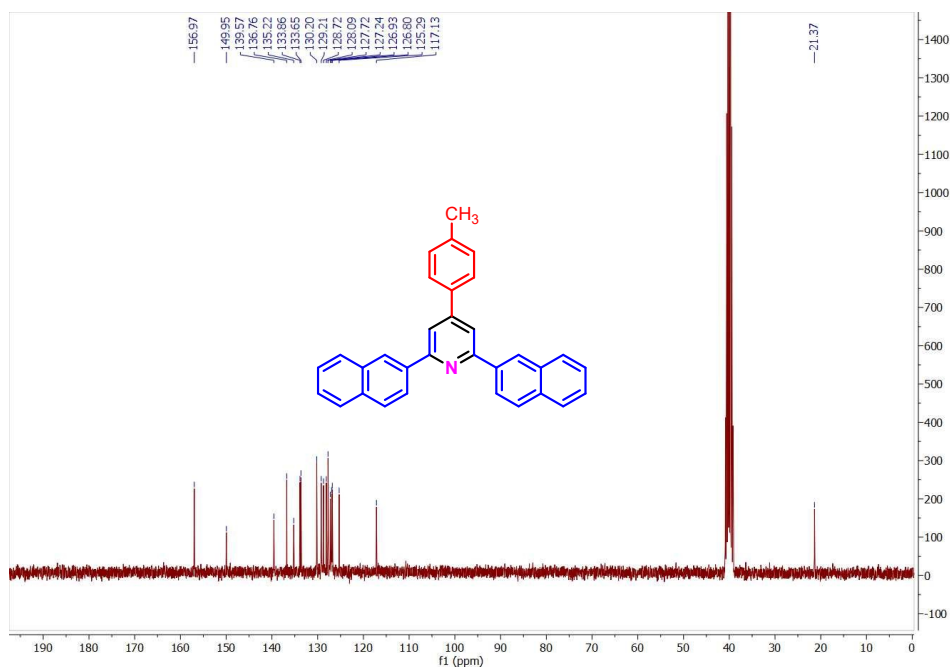

53: FT-IR spectrum of 4-(3-fluorophenyl)-2,6-di(naphthalen-2-yl)pyridine (2g).

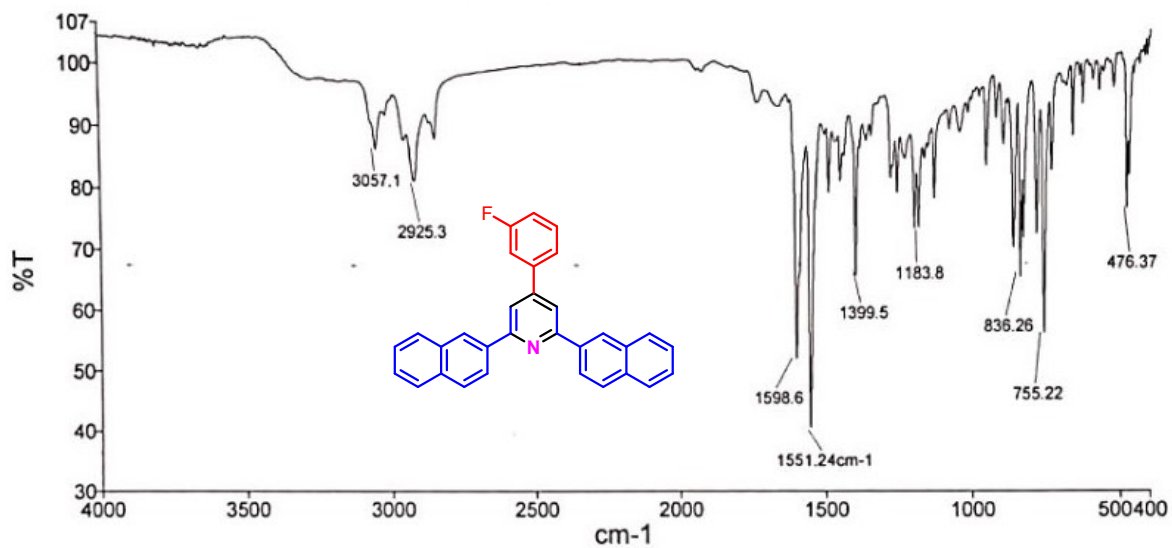

54: <sup>1</sup>H NMR spectrum of 4-(3-fluorophenyl)-2,6-di(naphthalen-2-yl)pyridine (2g).

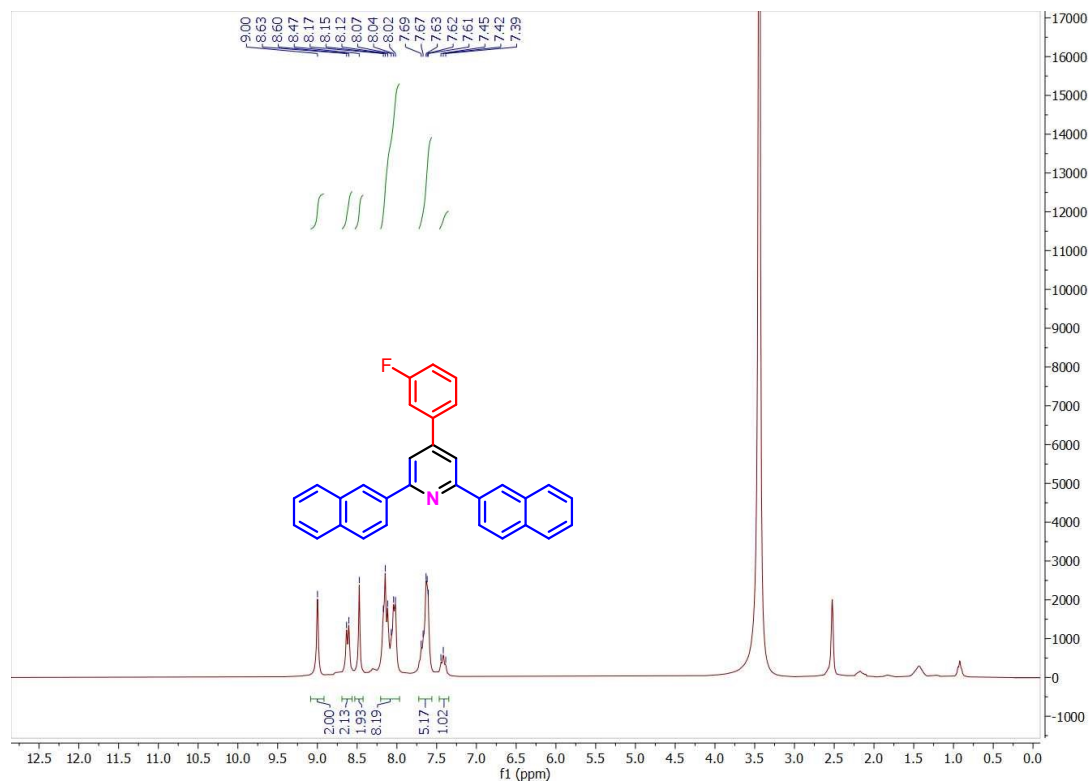

55: <sup>13</sup>C NMR spectrum of 4-(3-fluorophenyl)-2,6-di(naphthalen-2-yl)pyridine (2g).

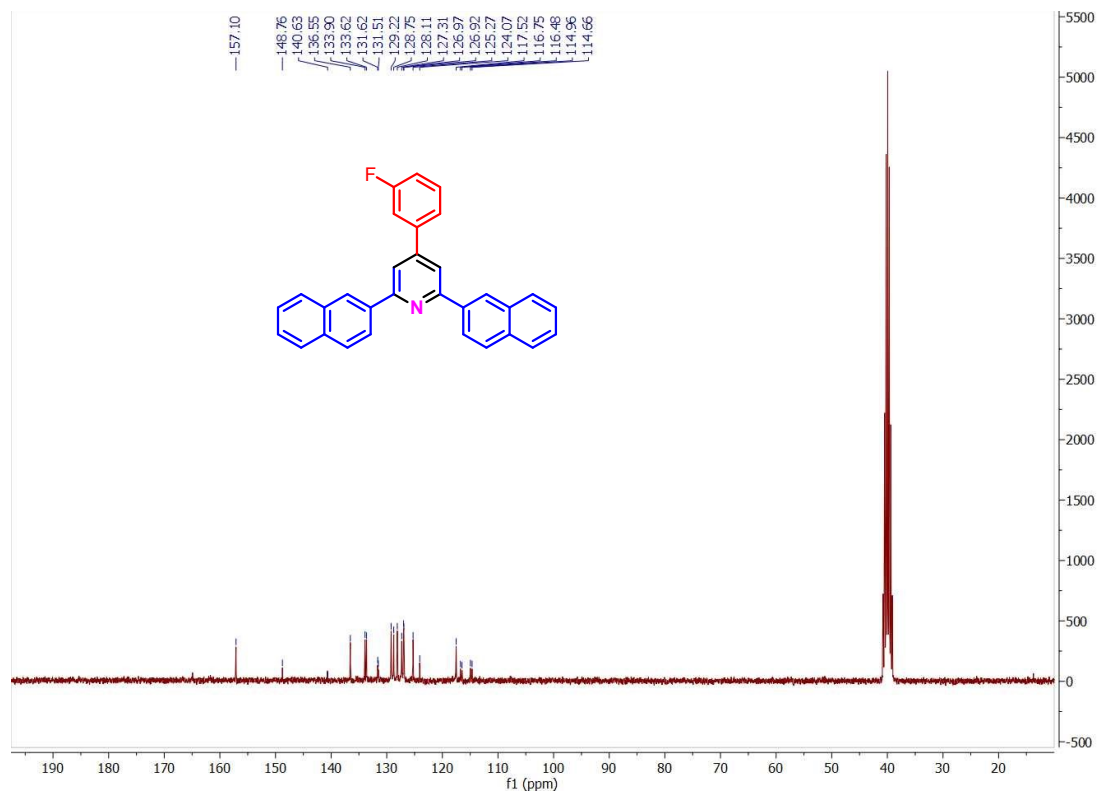

56: FT-IR spectrum of 4-(4-bromophenyl)-2,6-di(naphthalen-2-yl)pyridine (2h).

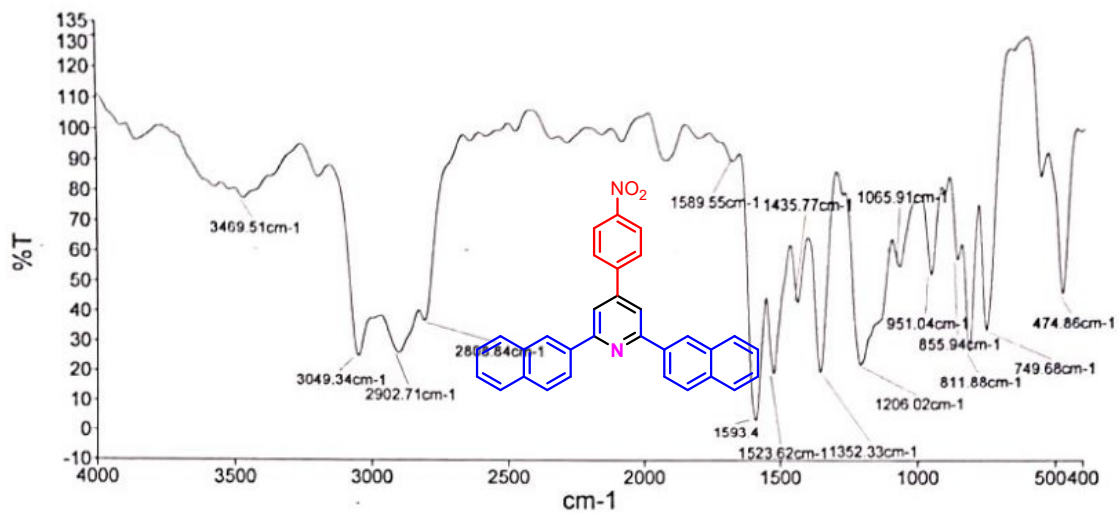

57: FT-IR spectrum of 4-(furan-2-yl)-2,6-di(naphthalen-2-yl)pyridine (2i).

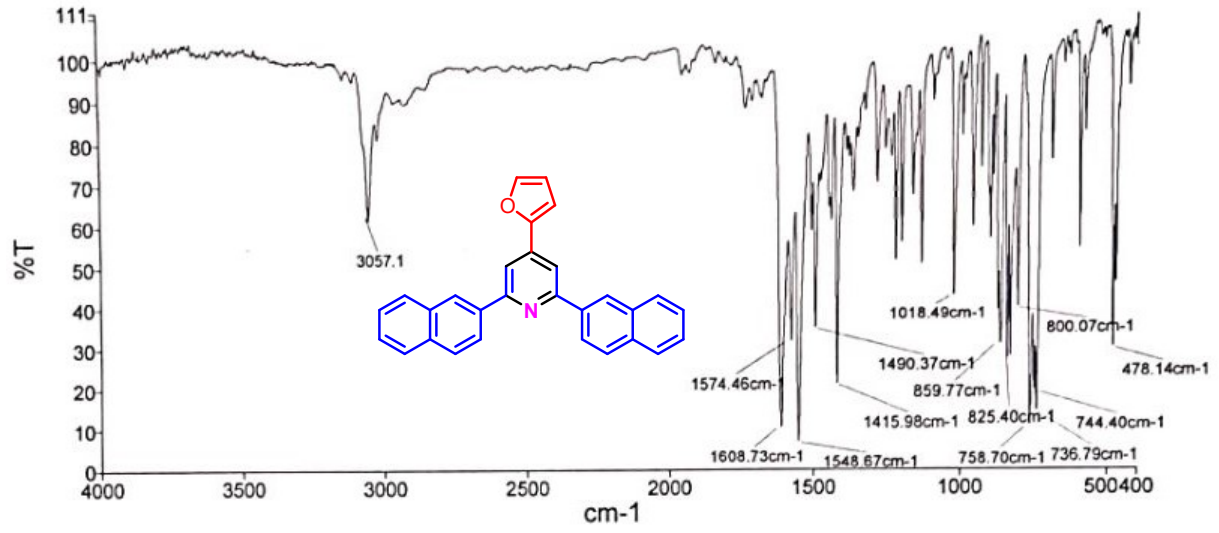

Supplement: d2ra04631h1.pdf [file d2ra04631h1.pdf]
